# Supplementary material for: A Multimodal Approach towards Genomic Identification of Protein Inhibitors of Uracil-DNA Glycosylase
Source: MDPI journal article supplement (doi:10.3390/v15061348), 2023-06-10
Supplement: s1 [file s1]

## Supplementary information

### Section S1 – Methods

#### Protein accessions and encoding synthetic *E. coli* optimised DNA sequences

##### Ugi-2

*Bacillus* phage vB\_BpuM-BpSp Gene “Bp8pS\_259” product [Ugi-2] (Protein ID: ALN97938.1)

```
1 MKFNISIISF IFTMIHKNNK RKHNLKRKDN SLMYKNIEDL NKFASKILET EISFEESITF
61 TPDEVEENIG EKPNRDKICH STSLEDGRVI MLLTELEPNY TPWKLLELEE DGFKELYSKS
121 I
```

##### Codon-optimised DNA Sequence for vB\_BpuM-BpSp Ugi

```
1 ttgaaattca atatctctat tatttctttt atttttacta tgaatccacaa aaacaacaag
61 cgtaaacata atctgaagcg caaggataat tccttaatgt ataaaaacat tgaagatttg
121 aataagtttg cttctaaaat cctggaaact gaaatctcct ttgaagaaag cattaccttt
181 actcctgatg aggtagaaga aaatattggt gagaaaccta atcgtgataa gatctgtcat
241 agcacgtcct tagaagacgg tcgtgtaatt atgttactga ctgaattaga accaaactat
301 actccttgga agctgttaga attagaagaa gatggcttca aagaactgta cagcaagagc
361 atctaa
```

The annotated sequence has three potential start codons (coloured blue). Homology with PBS1 Ugi starts after the 3<sup>rd</sup> methionine, hence we cloned the sequence starting from the 3<sup>rd</sup> methionine.

---

##### SAUGI homologs

*Staphylococcus aureus* SAUGI protein sequence (PDB: 3WDG):

```
1 MTLELQLKHY ITNLFNLPKD EKWECESEIE IADDILPDQY VRLGALSNI LQTYTYYSDF
61 LHESNIYPFI LYYQKQLIAI GYIDENHDMD FLYLHNTIMP LLDQRYLLTG GQ
```

##### Codon-optimised DNA Sequence for SAUGI:

```
1 atgactctgg aactgcaact caaacactat atcaccaatc tgttcaacct gccaaaggat
61 gaaaagtggg aatgtgaatc tatcgaagaa atcgtctgat atatcctgcc tgaccaatat
121 gtacgtctcg gtgcactcag caataaaatc ctgcaaacct atacctacta ctctgatact
181 ctgcacgaaa gcaatatcta ccctttcatt ctctactatc agaaacagct catcgccatc
241 ggctatatcg atgaaaatca cgatatggat ttctgtgacc tccacaacac catcatgcca
301 ctcttgatc aacgttactt gctcacagggt ggccaataa
```

***Macrococcus caseolyticus* MCUGI1 protein (Accession: WP\_101156358.1)**

1 MKQIKAHLTH YVEEILNLSS QEYLTEFIQL GIEELNWGER KIPEKLKGAI IDTYTFYNHS  
61 LIKDYIYSFI GTYQGKIILL GYTKGEYEHF FYINDTDKTL HSELHLLNLT EEDLEFVNVG

**Codon-optimised DNA Sequence for MCUGI1:**

1 atgaaacaaa tcaaagcgca tctcactcgc tacctcgaag aaattctgaa actctcttct  
61 caagaatacc tgactgaatt cgtacaactc ggcacgcagg aattggcatg ggtagagcgt  
121 aaaattccag agaagctcaa aggtgcaatc atcgacactt acacctttta caaccactcc  
181 cttatcaaag attacatcta ctctttcatc ggtacctatc aaggcaagat catcttagtg  
241 ggttacacta acggtgaata cgaacatttc ttctacatca atgatacggg caagactctg  
301 cacagcgagc tgcatttgct gaatcttacg gaggaggatt tggaatttgt caacgtgggt  
361 taa

***Macrococcus caseolyticus* MCUGI2 protein sequence (Accession: WP\_101143899.1)**

1 MSIKKNLTDF VERIHRLPHY HYSVEHVQLG VEEFIIEPKV ISPSLEGKVL DTITYYSDEL  
61 EDIYSFIAYY KDTVVSIGYV KGDECYSIYL NNLEETLHDE LYLINLKVED LFYANFDVG

**Codon-optimised DNA Sequence for MCUGI2:**

1 atgtctatca agaagaatct gacggatttc gtagaacgta ttcaccgtct gccacattat  
61 cattattctg tcgaacatgt tcagttaggc gtcgaagaat tcatcattga accaaagggt  
121 attagccctt ccctcgaagg taaagtactg gacacctata cctactatag cgatgaactg  
181 gaggatatct actcctttat agcctattac aaggataccg ttgtcagcat cggttatgtc  
241 aaagggtgac agtgctatag catctacctg aacaacctgg aagagaccct gcacgatgag  
301 ctctacctga tcaacctgaa agtggaggac ctgttctatg ccaacttcga cgtgggttaa

***Macrococcus bohemicus* MBUGI protein sequence (Accession: WP\_165958605.1)**

1 MSLSEQLCKF VERRFKYLND IWYFEHVETT LGEIFDSKDL SGDLSADKEV DTFTYFSMTL  
61 DDEHVYPFIV QDDDQIIAMG YVEEEVKLI YLTDGKSIFI DELHLLDTNK ESVQNETVG

**Codon-optimised DNA Sequence for MBUGI:**

1 atgagcttgt ctgaacagct gtgtaagttt gtagaacgtc gctttaagta tctgaatgat  
61 atctgggtatt tcgaacatgt agaaaccact ctgggcgaaa tctttgatag caaggatctg  
121 tctgggtgatc ttagcgccga caaggaagtt gataccttta cctatttttc tatgactctg  
181 gatgatgaac atgtttatcc atttatcgta caggatgacg atcagattat cgcaatgggt  
241 tatgtcgaag agaagaagt gaaactgatc tatctcacag atggtaaaag cattttcatc  
301 gatgagctgc atcttctcga tactaacaag gagagcgttc aaaatgaaac tgtgggttaa

### ***Salinicoccus* sp. YB14-2 SYUGI protein sequence (Accession: WP\_052256111.1)**

1 MHQKLKQYIT RHLKKSEDEY LSESFVLPST ETFQSPQFQR LFDDQSLSHQ LYYSTTDDEP  
61 FFPFEVYQDD TLIALGYMEE DKQHILYLKH DDEILVEEL

#### **Codon-optimised DNA Sequence for SYUGI:**

1 atgcatcaga aattgaaaca gtatatcact cgccacctga agaaatcgga ggacgagtat  
61 ctgtcggagt ccttcgtact gccgagcacg gaaacgttcc agtctccaca gttccaacgt  
121 ctctttgacg atcagtcctt ctctcatcag ctgtactatt ccaccacgga tgatgagcca  
181 ttcttcccgt tcgaagttta tcaagatgac actctgattg cgctcggtta tatggaagaa  
241 gataaacagc atatcttgta cctgaaacat gacgatgaaa tcctggttga agaactttaa

### ***Jeotgalicoccus meleagridis* JMUGI protein sequence (Accession: WP\_185124884.1):**

1 MNTKLKIYIK KYFPELSTLT WSDEAVSMMSG DELFEDTKLK SLYENESLDT RLYYPIEINS  
61 AILPFEIYKE ETLVALGYTN DESQKIIYFK HGAETLINHL

#### **Codon-optimised DNA Sequence for JMUGI**

1 atgaacacca aactgaaaat ctatatcaaa aaatactttc cggagctgtc cactctcacc  
61 tgggtctgatg aagcagttag catgagcggg gacgagctgt ttgaggacac gaagctgaaa  
121 tctctgtacg aaaacgagag cctggacacg cgcctctatt accctattga aatcaattct  
181 gcaattctgc cgtttgagat ctacaaagag gaaactttgg ttgccctggg ctataccaat  
241 gacgaatccc aaaaaattat ttattttaag catggcgcgg aaactctgat caatcacctg  
301 taa

---

## **p56 homologs**

### ***Bacillus* phage VMY22 Gene "VMY22\_4" product [p56] (Gene ID: 26625151):**

1 MEGFKDSYTL IYVTRDEEGK MFDIKLENQT KEECEIYGM ITDEILIWNM ILEGMF

#### **Codon-optimised DNA Sequence for *E. coli* high-yield expression of VMY22 p56:**

1 atggaagggt tcaaagactc ctacaccttg atctacgtga ctgcgatga agaaggcaag  
61 atgtttgata ttaaaactgga aaaccagacc aaggaagaat gcgaaattat ctatggtatg  
121 attactgacg aaattcttat ctggaatatg atcctggaag gtatgttcta a

### ***Bacillus* phage Goe4 gene "Goe4\_c00070" product (Accession: AYD87716.1). Blue coloured methionine indicates the start codon of the cloned truncated sequence**

1 MRKYETILIN DFMSKEIVTT VKEEDYLKVV EEKEVLENTI KMYKLEHKKI EKELKEKDEE  
61 IEKLKGNNEK WEEISLGTKQ NFTKEINKKD EEIKRKNKTI DNL**M**KKLIKL EEKEEQLYTL  
121 KYIYDVGVDV KEYEQNGMLK EDAEELIGMD SDNWNHWSLT KEERPDKDKI VEGLLIRCES  
181 NEELIKELES RNENLEIENR QLLNDRRLKI GLSDRRA

## Codon-optimised DNA Sequence for the cloned truncated Goe4

```
1 atgaaaaaac tgatcaaatt ggaagagaaa gaagaacaac tgtacactct caaatacatc
61 tatgatgtcg acggtgttgt taaagaatat gaacaaaacg gtatgttgaa agaagatgct
121 gaagaactga ttggtatgga ttctgataat tggaatcact ggagcctgac taaagaagaa
181 cgtcctgata aagataaaat tgttgagggg ctcctgattc gttgtgaatc taacgaggaa
241 ctgatcaaag agttggaaaag ccgcaatgaa aacctcgaaa tcgaaaatcg tcaactgttg
301 aatgatcgtc gtctcaaaat tgggtctgtct gatcgccgtg cataa
```

*Bacillus* phage DK2 gene "DK2\_00007" product (Accession: AZU99760.1). Blue coloured methionine indicates the start codon of the cloned truncated sequence

```
1 MRKLTCLNLM KVGEDDYLK VVEEKELKI GQDNGIKEVC KLNRELLEQD NLMKEKDEVI
61 ERLDKENKFH NNEFKRLSQY ILNNYQNGK LLIVDSIIAQ CEIFDKENQG LSIRCESLEE
121 EVEGLRKENI EMIKTIKTND KKDTYTLSYS YLGSDGVTIK NYRQSGLLKE EYEEMYGMDS
181 DNWLSHSLVK DRKEVL
```

## Codon-optimised DNA Sequence for the cloned truncated DK2

```
1 atgattaaaa ccattaaaac caatgacaaa aaagatactt ataccctgag ctattcttat
61 ctcggttctg atggtgtaac cattaaaaat tatcgtcaat ctggtctgtt gaaagaagaa
121 tatgaggaaa tgtatggtat ggattctgat aattggctgt ctcatagcct cgtaaaagat
181 cgtaaggagg tgctgtaa
```

*Bacillus* phage DK3 gene "DK3\_00008" product (Accession: AZU99806.1). Blue coloured methionine indicates the start codon of the cloned truncated sequence

```
1 MKEKDEEIEI LKKQWEDSPF YNWYREDNVK RMLKEKDEEI EMLKEKLDKV MNDDTYLKEI
61 ENKNKDIDNL IEKVNKLDKE NQGLSIRCES LEEVEGLRN QIHFKIDEL TRYMSKNYPM
121 FAGMQVSDVV ISLLEGLKEE KEEKEEKEEK EEFWTLRYNL VVNNKEKEVV QYHMIKEDAE
181 ELIGMDSDNW NKYSLEKEVL
```

## Codon-optimised DNA Sequence for the cloned truncated DK3

```
1 atgcaagtta gcgatgttgt tattagcctc ctggaagggtc taaagaagaa aaagaagaaa
61 aagaagaaaa aggaagaaaa agaagaattht tggactctgc gttataatct ggtcgttaac
121 aataaagaaa aagaagttgt tcaatatcac Atgatcaaag aagacgctga agaactgatt
181 ggtatggatt ccgataattg gaataaatat tctctcgaaa aggaggtggt gtaa
```

---

## Ung variants

SAUNG protein sequence (accession: WP\_000455258.1) with hexahistidine tag:

```
1 MEWSQIFHDI TTKHDFKAMH DFLEKEYSTA IVYPDRENIY QAFDLTPFEN IKVVILGQDP
61 YHGPNQAHGL AFSVQPNKAF PPSLRNMYKE LADDIGCVRQ TPHLQDWARE GVLLLNNTVL
121 VRQGEANSHR DIGWETFTDE IIKAVSDYKE HVVFILWGKP AQQKIKLIDT SKHCIIKSVH
181 PSPLSAYRGF FGSKPYSKAN TYLESVGKSP INWCESEAAH HHHH
```

### SAUNG-6xH DNA sequence:

```
1 atggaatgga gccaaatddd ccacgatata actacgaagc acgactttaa agctatgcat
61 gacttcctgg aaaaagaata ttccaccgct attgtatatc ctgatcgcca aaacatctac
121 caggcgtttg atctgacgcc gttcgagaac attaaagtgg tcatcttagg tcaggaccca
181 tatcatggcc cgaatcaggc gcacgggtctg gccttttagcg ttcagccaaa tgccaagttt
241 ccaccaagcc tgcgcaatat gtacaaagaa ctggctgatg atattggttg tgtgcgtcag
301 actccgcata tgcaagattg ggcgcgtgaa ggtgttttac tgctgaacac tgtgctgacc
361 gtacgtcagg gtgaagcaaa ttcccaccgt gatattggct gggagacctt tacggacgaa
421 attattaaag cagtgtctga ttataaagaa catgttgtct ttattttgtg ggggaaacct
481 gcgcagcaaa agatcaaact gatcgacacc tccaaacatt gcattatcaa atccgtgcac
541 ccgagccctc tgtctgcgta ccgcggcttc tttggttcca aaccgtactc taaagcgaac
601 acgtatctgg aatctgtggg caaatctccg attaaactgg gcgagtcctga ggcactggaa
661 caccatcata accatcatta a
```

### *Bacillus wiedmannii* Ung (BwUng) protein sequence (accession: WP\_060487945.1):

```
1 MENVLKNDWG PLLATEFEKE YYRKLADFLK EEYSTHVVP KVEDIFNALQ YTSYENTKVV
61 ILGQDPYHGP NQAHGLSFSV QPGVKTPPSL LNMYKELRDE YGYEIPNNGY LVKWAEQGV
121 LLNTVLTVRQ SEANSHKGKG WEHFTDRVIE LLNEREKPVI FILWGRHAQA KKKLITNPNH
181 HIIESVHPSP LSARRGFFGS KPYSKVNTIL ANMGEREIDW EIPNL
```

### DNA Sequence for *E. coli* high-yield expression of BwUng DNA sequence:

```
1 atggaaaatg ttctgaaaaa cgactgggga cccctgctgg caacggagtt cgaaaaagag
61 tattaccgca aactcgcgga tttcctcaag gaagagtaca gcaccacagt agtgtacccg
121 aaagtcgagg atatctttaa tgcgctccag tatacctcct atgaaaatac caaagtggtt
181 atcctgggga aggaccata tcacggcccc aaccaggcgc acggacttag ctttagcgtg
241 cagccgggtg tgaaaacgcc cccgagtctt ttaaatatgt ataaagagct ccgcgacgag
301 tatggatatg agatcccga caacgggttac ctggtgaagt gggcggagca ggcgctcctg
361 ttactaaaca cgggtgctgac cgtccggcag agtgaagcga actcccacaa aggaaaaggt
421 tggaacact tcaccgaccg agttatcgaa cttttgaatg aacgcgaaaa gccggtgatc
481 tttatcctct ggggcgggca cgcccaggct aaaaagaagc tgataaccaa ccctaatcat
541 cacattattg agtctgtcca cccgtcgccc ctctccgctc ggcgtggctt ctttggcagc
601 aaaccatact ccaaagtga cagatcctc gcaaacatgg gggaacgaga gatcgactgg
661 gagattccga acctgtaa
```

---

**Oligonucleotides for iPCR of pRSET-C vector and SDM4\_U12\_Ung construct for linearisation upstream of OE-PCR/ligation cloning:**

dsblntpRS\_iF: taagcttgatccggctgctaac

LBA2delst2iR: CATATGTATATCTCCTTCTTAAAG

**Oligonucleotides for amplifying HSV1-UNG from pTS106.1 construct:**

PTrc-BE1\_5p: cataacggt**tccgga**aatatttctgaaatgagctggtg

rrnB-Age\_3m: CATTATAT**ACCGGT**TATTGTCTCATGAGCGGATAC

N.B. *BspEI* and *AgeI* restriction sites are written in bold font.

**Oligonucleotides for mutating T7 promoter to Trc promoter via inverse PCR:**

T7\_to\_Trc\_iF: ATGTGTGGAATTGTGAGCGGATAACAAtttaactttaagaaggagatatac

T7\_to\_Trc\_iR: TATACGAGCCGGATGATTAAATTGTCAAatttcgcgggatcgagatc

**Sequence of Trc promoter through start codon in pBpST-CAT and sequence of T7 promoter through start codon (bases 20-102) in pRSET-C:**

**pBpST-CAT sequence (bases 20-102):**

ttgacaattaatcatccggctcgtataatgtgtggaattgtgagcggataacaatttaactt  
taagaaggagatatacatatg

**pRSET-C sequence (bases 20-102):**

taatacgactcactatagggagaccacaacggtttccctctagaaataattttgtttaactt  
taagaaggagatatacatatg

**Oligonucleotides for mutagenesis of PBS1 Ugi:**

**Library 1 (L1) oligos:**

ugiBrndDS\_F: nnnnnnnnnnccagaagaagtagaggaagtaattg

ugiBrndUS\_R: NNNNNNNNNNNAATCACTAGTTGTTTTCCTGTTTC

**Library 2 (L2) oligos:**

ugiBrndUS\_R2: ngnntcttgaatcactagttgttttccctgtttc

ugiBrndDS\_F2: NTNCTAATGTTACCAGAAGAAGTAGAGGAAGTAATTG

**Library 3 (L3) oligos:**

ugiBrndUS\_R3: nnnntcttgaatcactagttgttttcc

ugiBrndDS\_F3: NNNCTAATGTTACCAGAAGAAGTAG

**Oligonucleotides for PCR of synthetic genes [with additional 3' homology to pRSET-C vector in Bold font]:**

**Ugi-2:**

Bp8pS259\_5p: aataaaaacattgaagatttgaataag

Bp8pS259\_3m: **GTTAGCAGCCGGATCAAGCT**TAGATGCTCTTGCTGTACAG

**VMY22 p56:**

VMY22p56\_5p: atggaagggtttcaaagactcc

VMY22p56\_3m: **GTTAGCAGCCGGATCAAGCT**TAGAACATACCTTCCAGGATC

**DK2 p56 homolog:**

DK2p56\_5p attaaaaccattaaaaccaatgac

DK2p56\_3m **GTTAGCAGCCGGATCAAGC**TTACAGCACCTCCTTACGATC

**DK3 p56 homolog:**

DK3p56\_5p: caagtttagcgatgttggttattag

DK3p56\_3m: **GTTAGCAGCCGGATCAAGCTT**ACAACACCTCCTTTTCGAG

**Goe4 p56 homolog:**

Goe4p56\_5p: agcaaaaaactgatcaaattggaagag

Goe4p56\_3m: **GTTAGCAGCCGGATCAAGCTTA**TGCACGGCGATCAGACAG

**SAUGI:**

3wdgSaUgi\_5p: actctggaactgcaactcaaac

3wdgSaUgi\_3m: **GTTAGCAGCCGGATCAAGCTTA**TTGGCCACCTGTGAGCAAG

**MCUGI1:**

McUgi1\_5p: agcaaacaaatcaaagcgcatctc

McUgi1\_3m: **GTTAGCAGCCGGATCAAGCTT**ACCCACGTTGACAAATTCCAAATC

**MCUGI2:**

McUgi2\_5p: tctatcaagaagaatctgacg

McUgi2\_3m: **GTTAGCAGCCGGATCAAGCTT**ACCCACGTCGAAGTTGGC

**MBUGI:**

MbUgi\_5p: agcttgtctgaacagctgtg

MbUgi\_3m: **GTTAGCAGCCGGATCAAGCTT**ACCCACAGTTTCATTTTGAAC

**SYUGI:**

SYUgi\_5p: catcagaaattgaaacagtatatc

SYUgi\_3m: **GTTAGCAGCCGGATCAAGCTT**AAGTTCTTCAACCAGGATTTC

**JMUGI:**

JMUGI\_5p: aacaccaaactgaaaatctatatc

JMUGI\_3m: **TTTCCTACGCGAATTCATGATTAC**AGGTGATTGATCAGAGTTTC

### Supplementary Table S1.

#### Partial fractionation buffers used for small-scale growth purification.

| Buffer | Composition                      |
|--------|----------------------------------|
| 1      | 50 mM NaCl, 20 mM Tris, pH 8.0   |
| 2      | 100 mM NaCl, 20 mM Tris, pH 8.0  |
| 3      | 150 mM NaCl, 20 mM Tris, pH 8.0  |
| 4      | 200 mM NaCl, 20 mM Tris, pH 8.0  |
| 5      | 250 mM NaCl, 20 mM Tris, pH 8.0  |
| 6      | 300 mM NaCl, 20 mM Tris, pH 8.0  |
| 7      | 350 mM NaCl, 20 mM Tris, pH 8.0  |
| 8      | 500 mM NaCl, 20 mM Tris, pH 8.0  |
| 9      | 750 mM NaCl, 20 mM Tris, pH 8.0  |
| 10     | 1000 mM NaCl, 20 mM Tris, pH 8.0 |
| 11     | 1300 mM NaCl, 20 mM Tris, pH 8.0 |

### Supplementary Table S2.

#### Purification buffers.

All buffers were 0.45  $\mu$ m filtered prior to use.

| Buffer | Composition                                           |
|--------|-------------------------------------------------------|
|        | 300 mM NaCl, 20 mM Tris, 20 mM Imidazole, 0.5 mM EDTA |
| A      | pH 8.0                                                |
| B      | 300 mM NaCl, 20 mM Tris, 20 mM Imidazole, pH 8.0      |
| C      | 300 mM NaCl, 20 mM Tris, 500 mM Imidazole, pH 8.0     |
| D      | 50 mM NaCl, 20 mM Tris, pH 8.0                        |
| E      | 1 M NaCl, 20 mM Tris, pH 8.0                          |
| F      | 20 mM Tris, pH 8.0                                    |
| G      | 200 mM NaCl, 20 mM Tris, pH 8.0                       |



## Principles of the Cellular Survival assay to assess Ung inhibition function.

CJ236 is a genomic mutant exhibiting a phenotype deficient in Ung and dUTPase activity. Due to the inability of CJ236 cells to prevent accumulation of dUTP in the nucleotide pool (*dut*) or to repair uracil-DNA arising by replicative incorporation or spontaneous cytosine deamination (*Ung*) a significant proportion of DNA positions will be occupied by deoxyuridine.

### Schematic representation of the Cellular Survival assay for Ung inhibitory activity.

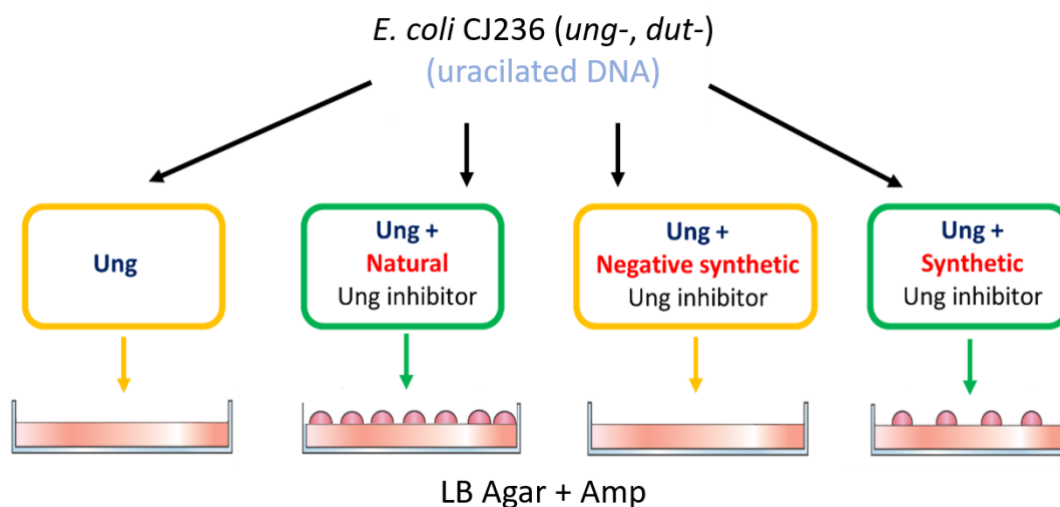

If Ung is transformed into CJ236, Ung-induced disintegration of the CJ236 genome will result, due to proximal uracil residues on both strands; this will render cells non-viable. However, transforming a natural/synthetic UngIn along with Ung protects the CJ236 genome and viable colonies can be harvested.

---

## Supplementary information

### Section S2 – Results

## Supplementary Figure S1.

### MSA of p56 sequences and distantly related sequences.

| Bacillus phage name             |                | 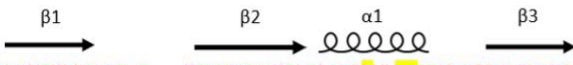 |     |                                                             |     | Sequence ID% with p56 from |     |
|---------------------------------|----------------|------------------------------------------------------------------------------------|-----|-------------------------------------------------------------|-----|----------------------------|-----|
|                                 |                |                                                                                    |     |                                                             |     | PZA                        | GA1 |
| p56 sequences                   | *PZA           | ( 56 aa)                                                                           | 3   | QNDFLDSYDVMTLLQDDN-G---KQYYEYH-KGLSLSDFEVLYGNTVDEIIKLRVDKIS | 56  | 100                        |     |
|                                 | Gxv1           | ( 56 aa)                                                                           | 3   | QNDFVDSYDVMTLLQDDD-G---KQYYEYH-KGLSLSDFEVLYGNTADEIIKLRDKML  | 56  | 98                         |     |
|                                 | BSTP6          | ( 56 aa)                                                                           | 3   | QNDFVDSYDVMTLLQDDN-G---KQYYEYH-KGLSLSDFEVLYGNTADEIIKLRDKVL  | 56  | 98                         |     |
|                                 | BSTP4          | ( 56 aa)                                                                           | 3   | QNDFIDSYDVMTLLQDDN-G---KQYYEYH-KGLSLSDFEVLYGNTADEIIKLRDKVL  | 56  | 98                         |     |
|                                 | *Phi29         | ( 56 aa)                                                                           | 3   | QNDFVDSYDVMTLLQDDD-G---KQYYEYH-KGLSLSDFEVLYGNTADEIIKLRDKVL  | 56  | 89                         |     |
|                                 | B103           | ( 56 aa)                                                                           | 3   | QNDFIDSYTLCLWLRDDN-G---NEHWEVH-PGLSLSDFEVYGNPHQIVKLRDKVL    | 56  | 64                         |     |
|                                 | NF             | ( 56 aa)                                                                           | 3   | QNDFIDSYTLCLWLRDDN-G---CEHWEVH-PGLSLSDFEVYGNPHQIVKLRDKVL    | 56  | 61                         |     |
|                                 | vB_BsuP-Goe1   | ( 56 aa)                                                                           | 3   | QNDFIDSYTLCLWLRDDN-G---SEHWEVH-PGLSLSDFEVYGNPHQIVKLRDKVL    | 56  | 59                         |     |
|                                 | Karezi         | (130 aa)                                                                           | 36  | QLGFEDSYMIQVQV-SSDQ---EEWVECH-ENMSLSDFEVYGNISGEIKRMTVVKYE   | 88  | 38                         |     |
|                                 | BeachBum       | ( 91 aa)                                                                           | 38  | EERFVDSYTLIYIT-EDETG---KR-FAILENQTIETEIIYGNIIDKIIVWNVILTM   | 91  | 29                         |     |
|                                 | Harambe        | ( 55 aa)                                                                           | 2   | SERFIDSYTLIYIT-EDESG---KR-FDCILENQTEDECEIIYGNIIDKIIVWNMILDM | 55  | 27                         |     |
|                                 | VMY22          | ( 56 aa)                                                                           | 1   | MEGFKDSYTLIYVTRDEE-G---KM-FDIKLENQTKEECEIIYGNITDEILWNMILEG  | 54  | 23                         |     |
|                                 | GA1            | (130 aa)                                                                           | 29  | HKGFTDSYLLVMIL-ENEVG---ETRLEVS-EGLTFDEVGIVGSVSDNILHMHTNYC   | 82  | 100                        |     |
|                                 | SRT01hs        | (124 aa)                                                                           | 29  | HKEFTDSYLLVLIL-EDVVG---ETRVES-EGLTFDEASYIIGTSDNINMHMINYC    | 82  | 73                         |     |
|                                 | vB_Bpu_PumA2   | ( 74 aa)                                                                           | 1   | MTQFNDSYWMVIVTKDDY-G---QHTVIGYTE-LDLNEVGIVGMTVEEIVCQFVKEG   | 54  | 27                         |     |
| p56 distantly related sequences | vB_Bpu_PumA1   | ( 68 aa)                                                                           | -9  | VTQFRDSYWMVLVTKDDF-G---ECTIMGS-KEMTMDIGYVIGMTIEEIEECQFVKEG  | 45  | 25                         |     |
|                                 | WhyPhy         | ( 77 aa)                                                                           | 1   | MTQFNDSYWMVIVTKDGF-G---EYTTIRYNE-VDLNEIGYIIGMTIEEIEECQFAKEG | 54  | 25                         |     |
|                                 | DK2            | (196 aa)                                                                           | 138 | TNDKKDITYLSYSYLGSD-GVTIKN-Y--RQSGLLKEEYEMYGMDSDNWLHSLVKDR   | 195 | 23                         | 21  |
|                                 | MG-B1          | (270 aa)                                                                           | 157 | EE-LEETWTLYKIY-NVD-GV-VKD-YE--QNGMIKEDAEELIGMDSNWIHYSLTKEE  | 208 |                            |     |
|                                 | vB_BthP-Goe4   | (217 aa)                                                                           | 111 | EEKEEQLYTLKYIY-DVD-GV-VKE-YE--QNGMLKEDAEELIGMDSNWNHWSLTKEE  | 163 | 25                         | 20  |
|                                 | Juan           | (242 aa)                                                                           | 136 | EEKEEQLYTLKYIY-EAE-GV-VKE-YE--QNGMLKEDAEELIGMDSNWNHWSLTKEE  | 188 |                            |     |
|                                 | Aurora         | (206 aa)                                                                           | 100 | SIKDEETWTLYKIY-DVD-GV-IKE-FE--QNGMIKEDAEELIGMDSNWNHWSLTKEE  | 152 |                            |     |
|                                 | QCM11          | (206 aa)                                                                           | 100 | EDNNEELWTLYKIY-DVD-GV-VKE-YE--QNGMLKEDAEELIGMDSNWNHWSLTKEE  | 152 |                            |     |
|                                 | *Stitch        | (165 aa)                                                                           | 59  | SIKGEETWTLYKIY-DVD-GV-VKE-YE--QNGMLKEDAEELIGMDSNWNHWSLTKEE  | 111 |                            |     |
|                                 | *Claudi        | (205 aa)                                                                           | 99  | SIKGEETWTLYKIY-DVD-GV-VKE-YE--QNGMLKEDAEELIGMDSNWNHWSLTKEE  | 151 |                            |     |
|                                 | Baseball_field | (253 aa)                                                                           | 147 | SIKGEETWTLYKIY-DVD-GV-VKE-YE--QNGMFREDAEELIGMDSNWNHWSLTKEE  | 199 |                            |     |
|                                 | DK3            | (200 aa)                                                                           | 148 | EEK-EEFWTLRYNLVVNN-----KE-KEVVQYHMIKEDAEELIGMDSNWNKYSLKEEV  | 199 | 18                         | 16  |
|                                 | DK1            | (255 aa)                                                                           | 202 | EEK-EELWTLRYNLVVNN-----KE-KEVVQYHMIKEDAEELIGMDSNWNKYSLKEEV  | 254 |                            |     |
|                                 | Dln1           | (191 aa)                                                                           | 139 | EEK-EELWSLEYVY-EKE-GI---RKNVILDPQPLEGIHELVGMDCDNWNVSWTIEKEV | 190 |                            |     |

\* Identical sequences are encoded by *Bacillus* phage Whiting18 (QRD99282.1) and *Bacillus* phage Arbo1 (UIS65815.1). † Identical sequence is encoded by *Bacillus* phage vB\_BveP-Goe6 (ASR76788.1). ‡ Identical sequences are encoded by *Bacillus* phages StevenHerd11 (AZF88314.1) and RadRaab (ASU04169.1). § Proteins with identical sequences in the region shown in this alignment are encoded by *Bacillus* phages VioletteMad (QDH50288.1), KonjoTrouble (ASU04129.1), and SerPounce (ARQ95541.1).

The top group of sequences shows the PHI-BLAST search generated p56 sequences using PZA p56 as an input, with the PROSITE pattern E-X(2)-Y-X(0,2)-G highlighted yellow. The secondary structure of PZA p56 is shown above its sequence. Percent identities with either PZA p56 or GA1 p56 are shown on the right. The bottom group includes sequences output from PSI-BLAST search only within *Salasmaviridae* genomes, using the VMY22 p56 sequence as input. These sequences share less sequence identity with the validated p56 sequences and their close homologs. Underlined names in *Bacillus* phage name column indicates sequences tested via an Ungln assay in this study or previous studies.

## Supplementary Figure S2.

Visual U-DNA attrition assay [*Staphylococcus aureus* UNG activity] - dilution series of Ung.

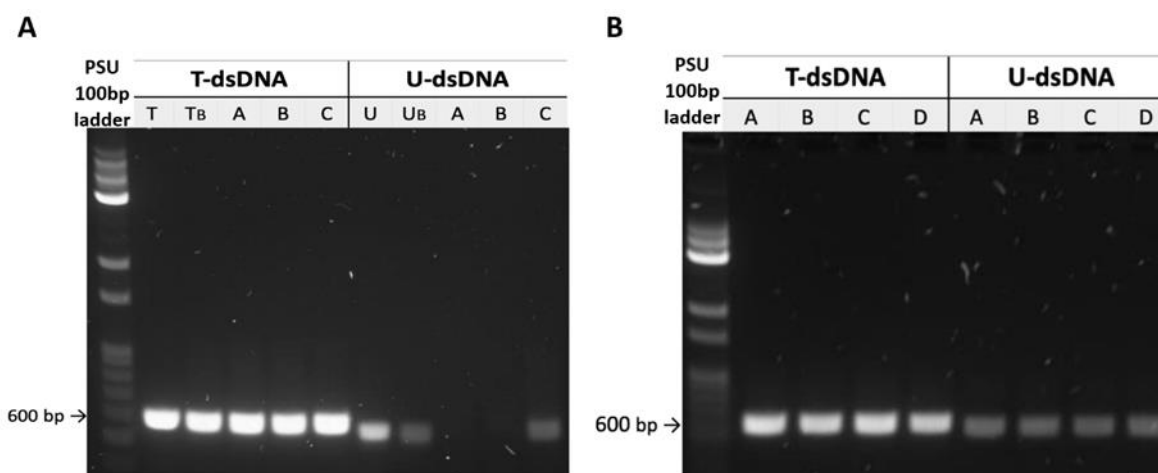

The Ung assay reaction products to verify two serial dilution of Ung from *S. aureus* [0.1 mg/mL, 3.97  $\mu$ M] are shown on 1 % agarose gels. (A) The reaction products are split according to the DNA substrate been used: T dsDNA and U-dsDNA. In each section the first two lanes represent the controls: untreated T-dsDNA (Lane T) and untreated U-dsDNA (Lane U); and treated T dsDNA (TB) and treated U-dsDNA (UB) in the absence of Ung. (A) The first serial dilution follows the order: Ung in 1:10 dilution (Lane A), 1:100 dilution (Lane B) and 1:1000 dilution (Lane C). (B) The reaction products following the second serial dilution are displayed in the following order: 1:200 dilution (Lane A), 1:400 dilution (Lane B), 1:600 dilution (Lane C), 1:800 dilution (Lane D). The minimum concentration of Ung that showed activity on U-DNA is 39.7 nM (1:100 dilution).

### Supplementary Figure S3.

Visual U-DNA attrition assay [*Staphylococcus aureus* UNG activity], validation with controls, 1% (w/v) agarose gel.

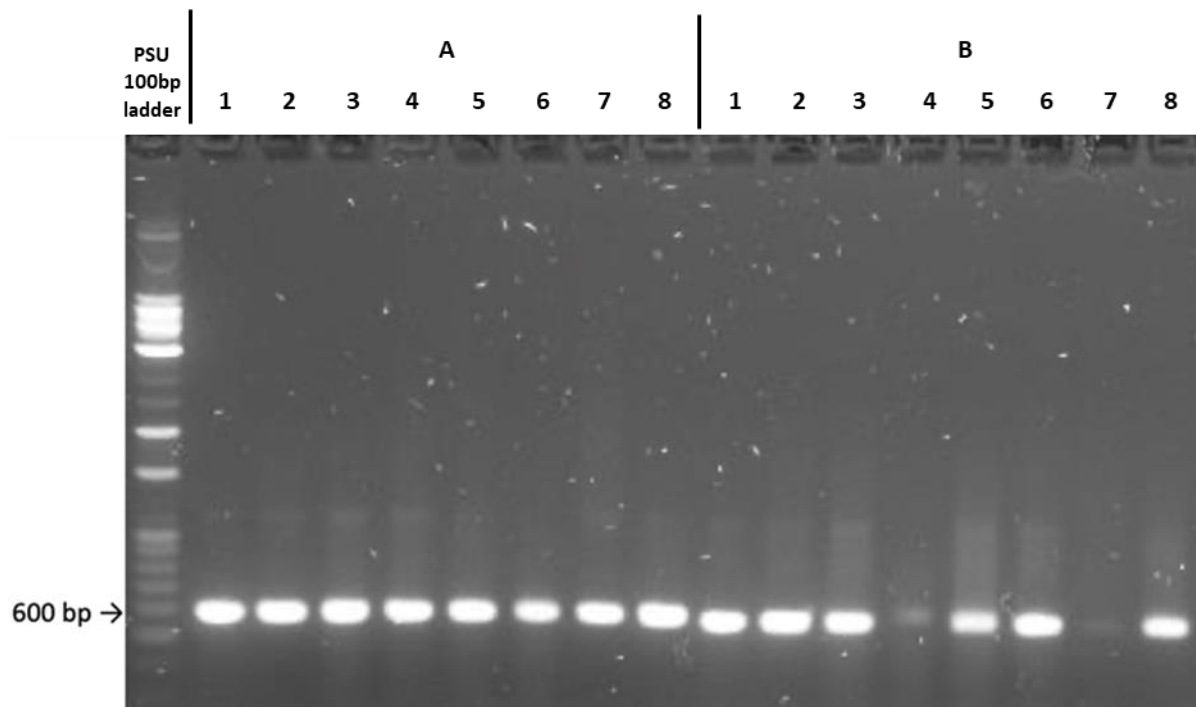

The UDG assay control is divided into two sub-sections. **(A)** T-DNA (3  $\mu$ L) is used in all lanes **(B)** U-DNA (5  $\mu$ L) is used in all lanes. Lanes components:

- 1: untreated dsDNA substrate.
- 2: treated dsDNA in 1X UDG buffer (NEB).
- 3: same as lane 2 with the addition of 1  $\mu$ L *LysY/I<sup>Q</sup>* cell lysate.
- 4: same as lane 3 plus 1  $\mu$ L of Ung [39.7 nM].
- 5: same as lane 4 including 1  $\mu$ L of PBS1 Ugi [2.6 mM].
- 6: same as lane 2 with the addition of 1  $\mu$ L CJ236 cell lysate.
- 7: same as lane 2 plus 1  $\mu$ L of Ung [39.7 nM].
- 8: same as lane 7 including 1  $\mu$ L of PBS1 Ugi [2.6 mM].

### Supplementary Figure S4.

#### Visual U-DNA attrition assay [*Staphylococcus aureus* UNG activity], to assess candidate Ung inhibitors

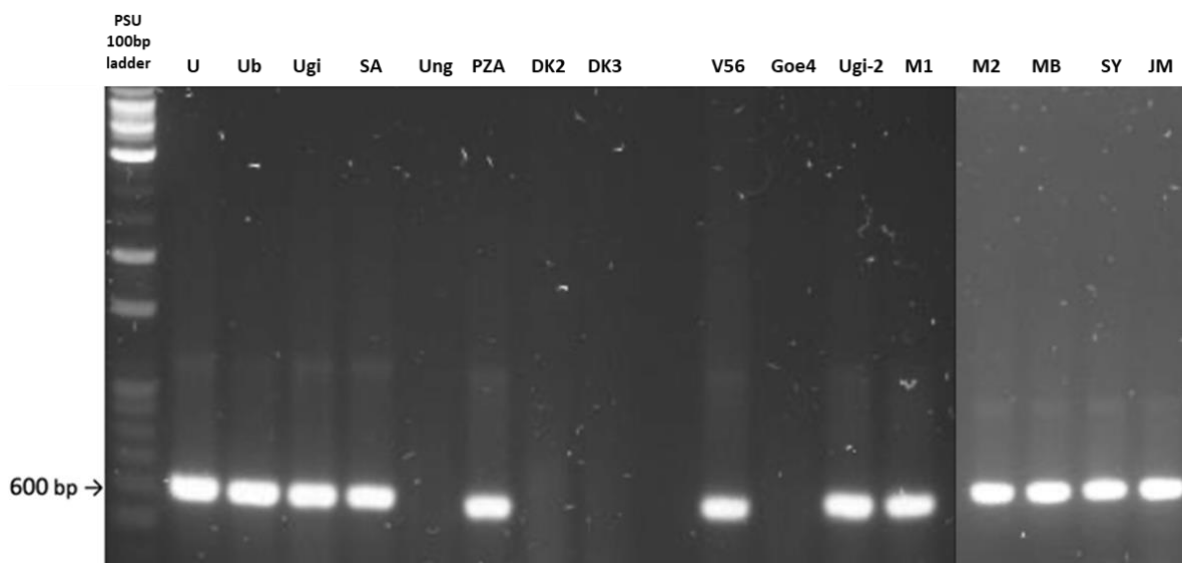

All reactions contained substrate DNA (~600 bp) in which all thymidine is supplanted by deoxyuridine. All reactions, excluding the leftmost control lane were incubated at 37 °C for 30 minutes. Lanes: (U) U-DNA substrate only; (Ub) U-DNA substrate treated with reaction buffer and conditions in the absence of Ung; all other lanes included SAUNG at 39.7 nM, and the control UngIns or the cell lysates of expressed potential Ung inhibitors as described below.

- Ugi = PBS1 Ugi
- SA = SAUGI
- Ung = Ung without added potential/actual inhibitor
- PZA = PZA p56
- DK2 = DK2 encoded potential p56
- DK3 = DK3 encoded potential p56
- V56 = VMY22 encoded p56
- Goe4 = Goe4 encoded potential p56
- Ugi-2 = Vb\_BpuM-BpSp encoded Ugi
- M1 = MCUGI1
- M2 = MCUGI2
- MB = MBUGI
- SY = SYUGI
- JM = JMUGI

The UDG assay showed that Ugi-2, VMY22 p56, MCUGI1, MCUGI2, MBUGI, SYUGI, and JMUGI are Ung inhibitors while the sequences tested from DK2, DK3, Goe4 are not able to inhibit Ung.

## Supplementary Figure S5.

**PSI-BLAST output using PBS1 Ugi as an input – shown as MSA with query anchored dots for identity:**

Query (PBS1 Ugi) 1 - 84

MTNLSDIIEKETGKQLVIQESILMLPEEVEEVIGNKPESDILVHTAYDESTDENVMLLTSDAPEYKPWALVIQDS  
NGENKIKML

YP\_009283008.1 1 - 84

.....  
.....

QXN70328.1 1 - 84

.....K.....E.....T...I.....NN  
.....

WCS68230.1 1 - 84

.....E.....T.....A.K.....I.....NN  
.....

ALN97938.1 51 - 112

-----EISFE...TFT.D....N..E..NR.KIC.STSL.D-GRVI....ELE.N.T..K.LELEE  
D

### Detailed output sequences of PBS1 Ugi PSI-BLAST output:

>YP\_009283008.1 uracil-DNA-glycosylase inhibitor [Bacillus phage AR9]

MTNLSDIIEKETGKQLVIQESILMLPEEVEEVIGNKPESDILVHTAYDESTDENVMLLTSDAPEYKPWALVIQDS  
NGENKIKML

>QXN70328.1 putative uracil-DNA-glycosylase inhibitor [Bacillus phage  
vB\_BspM\_Internexus]

MTNLSDIIEKETGKELVIQESILMTPEEIEEVIGNKPESDILVHTAYDESTDENVMLLTSDAPEYKPWALVIQNN  
NGENKIKML

>WCS68230.1 hypothetical protein Goe21\_01200 [Bacillus phage vB\_BsuM-Goe21]

MTNLSDIIEKETGKELVIQESILMTPEEVEEVIGNAPKSDILVHTAYDESTDENIMLLTSDAPEYKPWALVIQNN  
NGENKIKML

>ALN97938.1 uracil-DNA glycosylase inhibitor [Bacillus phage vB\_BpuM-BpSp]

MKFNISIIISFIFTMIHKNNKRKHNLKRKDNSLMYKNIEDLNKFASKILETEISFEESITFTPDEVEENIGEKPNR  
DKICHSTSLEDGRVIMLLTELEPNYTPWKLLLELEDGFKELYSKSI

Supplementary Figure S6.

MSA view (Flat query-anchored with dots for identity) for SAUGI homologs encoded by *Macrococcus* species.

|                |                                                                                                                        | ID% vs MCUGI1 |
|----------------|------------------------------------------------------------------------------------------------------------------------|---------------|
| MCUGI1         | MKQIKAHLTHVVEEILNLSSQEYLTEFIQLGIEELNWGERKIKEPLKGAIDTYTFYNHSLIKDYIYSFIGTYQGKIILLGYTKGEYEHFFYINDTKTLHSELHLLNLTEEDLEFVNVG | 100%          |
| WP_101171195.1 | .....V.....V.....Y.....E.....                                                                                          | 97%           |
| BAI83361.1     | .....R.....V.....A.....N.....                                                                                          | 97%           |
| WP_101144769.1 | .....IN.....N.I.....                                                                                                   | 97%           |
| WP_101171460.1 | .....V.....V.....Y.....D.....E.....                                                                                    | 96%           |
| WP_101144135.1 | .....R.....IN.....N.I.....                                                                                             | 96%           |
| WP_133422038.1 | .....R.....V.....A.....N.....V.....                                                                                    | 96%           |
| WP_165983527.1 | .....R.....V.....A.....N.D.....Y.....                                                                                  | 95%           |
| WP_086041446.1 | .....R.L...K.....V.....A.....N.....V.....                                                                              | 94%           |
| MCUGI2         | M.S..KN..DF..R.HR.PHYH.SV.HV...V..FIIPEKV.SPS.E.KVL...Y.SDE.--ED....AY.KDTVWSI..V..DECYSI.L.NLEE...D..Y.I..KV...FYA.   |               |
| MBUGI          | M.LS.Q.CK.VERRFKY..DI.YFEHVETTL..IFDSKD.S.DLSADKEV..F.YFSMT.DDEHV.P..VQDDQ..AM..VEE.EVKLI.LT.GKSIFID....DTNK.SVQNET..  | 100%          |
| WP_188017758.1 | M.LS.Q.CK.VERRFKY..DI.YFEHVETTL..IFDSKD.S.DLSADKEV..F.YFSMT.DDEHV.P..VQDDQ..AM..IEE.ELKLI.LT.GKSIFID....DTNK.SVQNET..  | 98%           |
| WP_203545932.1 | M.LS.Q.CK.VERRFKY.TDI.YFEHVETTL..ILDSKD.S.DLSADKEV..F.YFSMT.DDEHV.P..VQDDQ..AM..IEE.ELKLI.LT.GKSIFVD....DTNK.CVQNET..  | 95%           |

Three groups can be observed according to sequence similarity. Group I include MCUGI1 and 8 homologous sequences with at least 94% Identity; Group II includes one sequence, MCUGI2; and Group III include MBUGI and 2 homologous sequences with at least 95% identity. Representative sequences of these groups (MCUGI1, MCUGI2, and MBUGI) were selected to assess Ung inhibition function.

## Supplementary Figure S7.

### Genomic mapping of SAUGI homologues in different types of SCCmec.

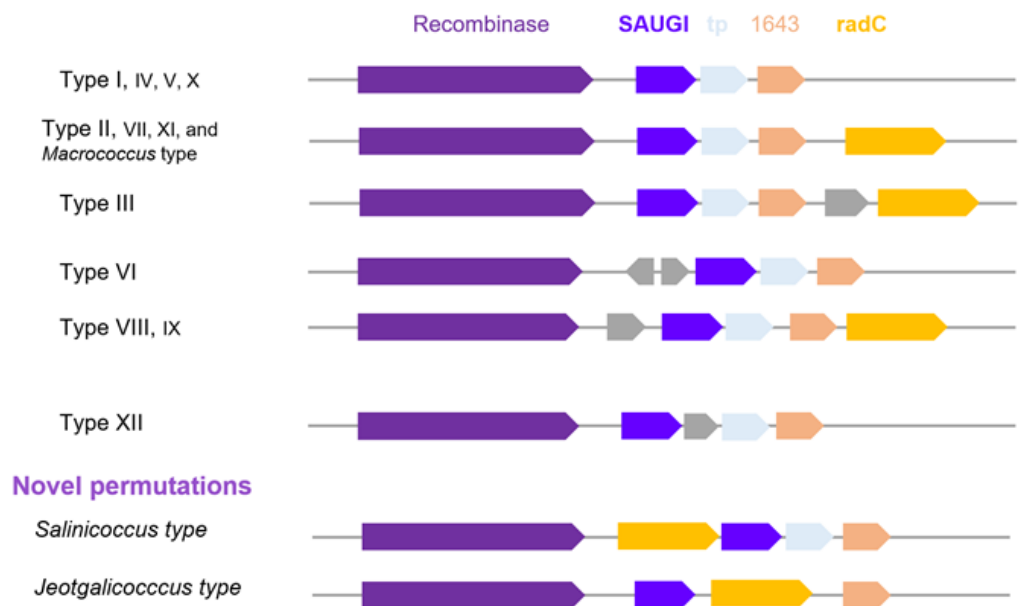

tp: a transposase usually annotated as DUF960, 1643: DUF1643, radC: DNA repair protein radC.

All SCCmec elements contain a *mec* gene complex (*mec*) and a cassette chromosome recombinase complex (*ccr*). Five classes of *mec* and eight types of *ccr* have been reported. Based on the combination of *mec* and *ccr*, SCCmec elements are classified into different types. Twelve types of SCCmec elements in *S. aureus* have been identified; all these types include a trio of genes: (1) SAUGI, usually annotated as DUF950; (2) tp, usually annotated as DUF960; and (3) DUF1643. This DUF 950-960-1643 trio, is always preceded by a recombinase gene and is often followed by a fourth gene, annotated as *DNA repair protein radC*. The genomic context of *MCUGI* shows similarity to known SCCmec types of *S. aureus*. However, the *SYUGI* and *JMUGI* genomic contexts are novel permutations in the *ccr* complex, wherein *radC* either precedes the DUF 950-960-1643 trio (in *Salinicoccus*) or separates SAUGI and DUF1643 (in *Jeotgalicoccus*). Gray coloured ORFs are non-conserved genes in SCCmec.



## Supplementary Figure S8.

### A comparison of Ugi variants.

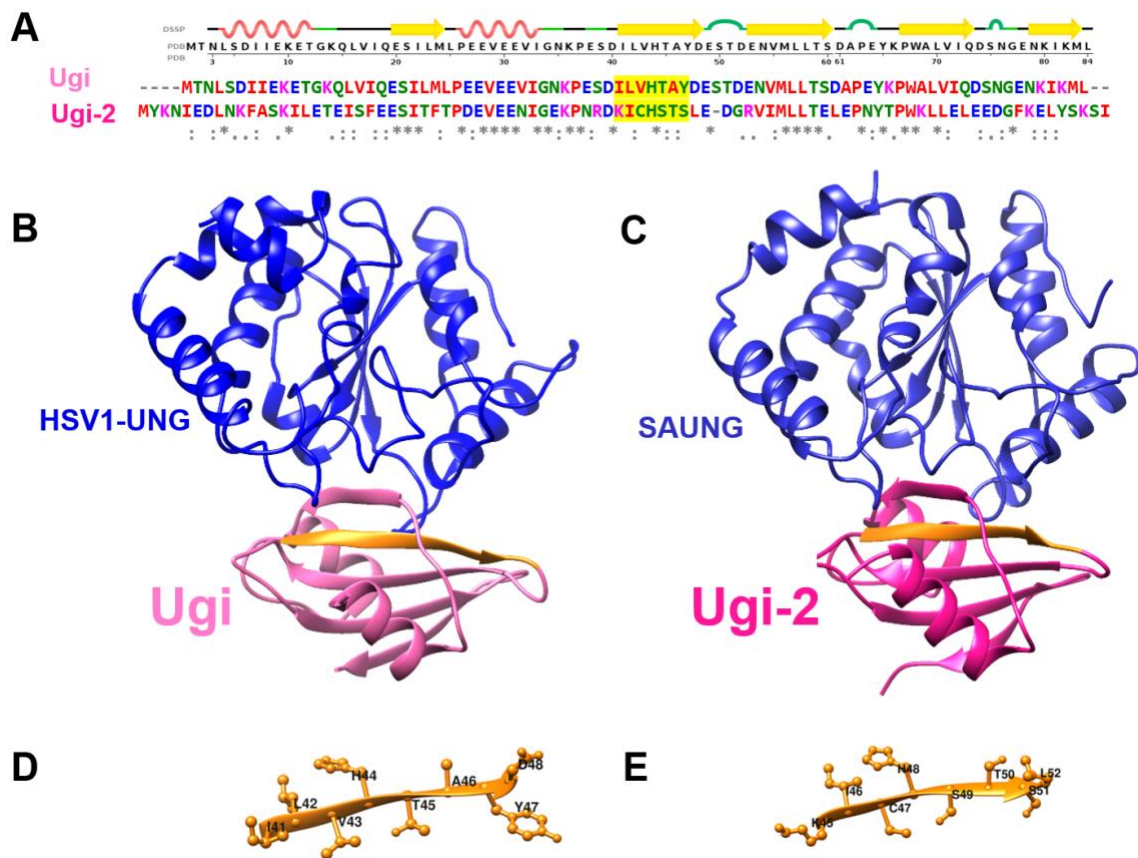

(A) structure-based sequence alignment of both Ugi variants with DSSP secondary structure of PBS1 Ugi on the top row. (B) HSV1-UNG:Ugi (PBS1) complex crystal structure (PDB: 1UDI). (C) SAUNG:Ugi-2 complex crystal structure (new data presented in this study, PDB: 8AIM). Even though Ugi variants share relatively low sequence identity (32%), their structures share the same fold, and are superimposable, with an RMSD value of 1.343 Å. (D) The 2<sup>nd</sup> β-strand of Ugi. (E) The 2<sup>nd</sup> β-strand of Ugi-2. Low sequence identity between Ugi variants can be observed in some core-forming secondary structures such as the 2<sup>nd</sup> β-strand (coloured orange in B, C, D, and E) in which only 1 out of 8 residues is identical between these Ugi variants and 4 out of 7 residues are non-conservative mutations (highlighted yellow in the alignment in panel A).

## Supplementary Figure S9.

### A comparison of SAUGI and MCUGI1 structures.

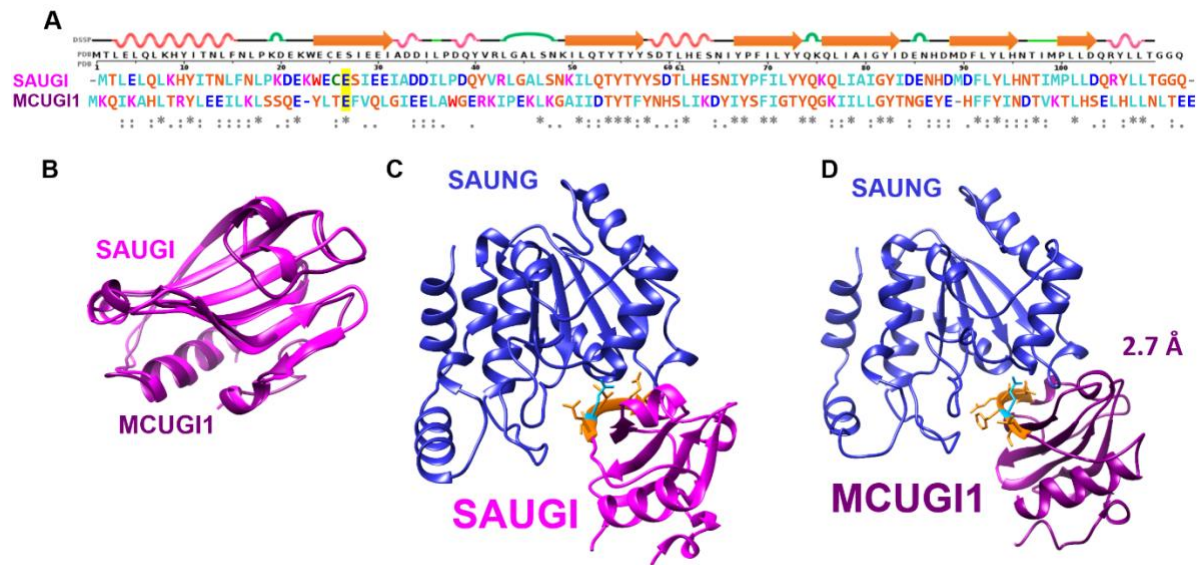

(A) structure-based sequence alignment of SAUGI and MCUGI1 with DSSP secondary structure of SAUGI on the top row. (B) Superposition of SAUGI (PDB:3WDG) and MCUGI1 (new data presented in this study); RMSD between 73 pruned atom pairs (no pair is longer than 2 Å) is 1.005 Å, and across all 93 pairs is 3.425 Å. (C) SAUNG:SAUGI complex structure (PDB:3WDG). (D) SAUNG:MCUGI1 complex crystal structure (determined in this study). Even though MCUGI1 shares low sequence identity (29%) with SAUGI, their structures are superimposable. The 1<sup>st</sup> β-strand of SAUGI and MCUGI1 are coloured orange in panels C and D. In this β-strand, only 1 out of 8 residues (a glutamic acid residue, highlighted sky blue in panel A and coloured sky blue in panels C and D) is identical between both variants.

## Supplementary Figure S10.

### Structure-based sequence alignment of Ugi and SAUGI.

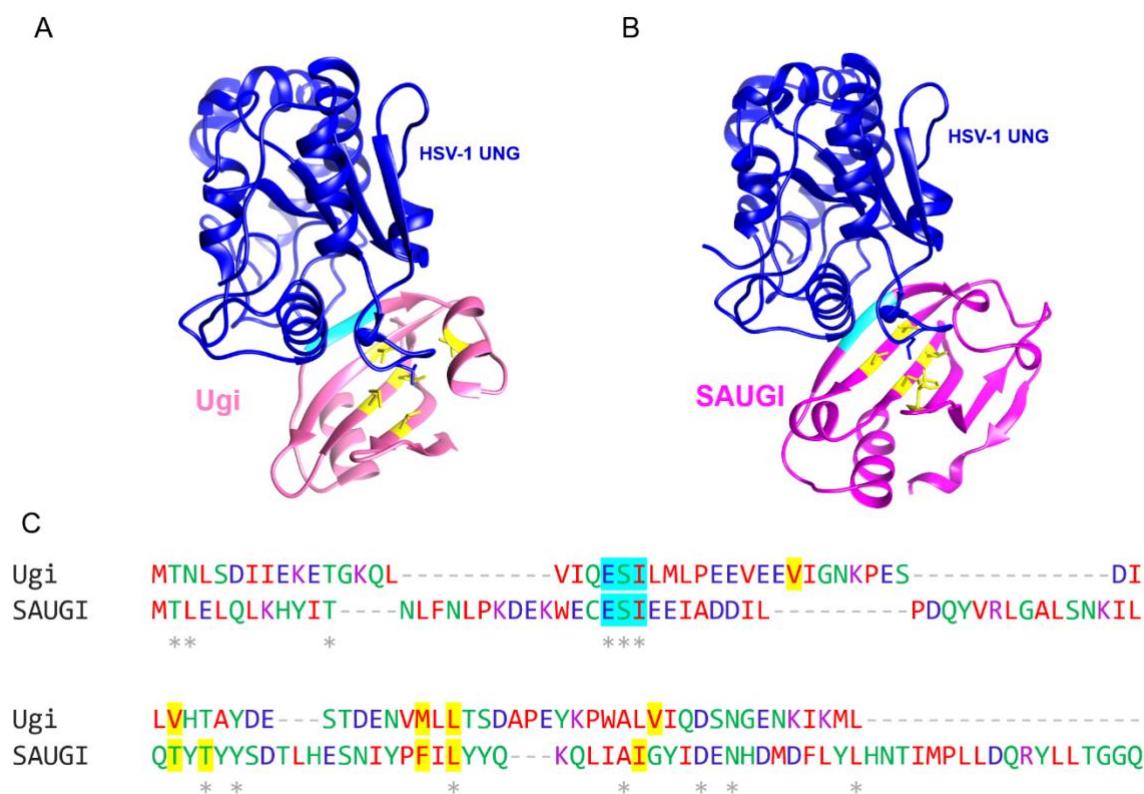

HSV1-UNG complexes with (A) Ugi (PDB: 1UDI). (B) SAUGI (PDB: 5AYS). (C) Structure-based sequence alignment of Ugi (84 aa) and SAUGI (112 aa). The apical residue [leucine in HSV1-UNG, shown as a stick] of the Ung minor groove DNA intercalation loop is sequestered by UngIn residues coloured yellow in panels A and B and highlighted yellow in panel C. Although the structures of Ugi and SAUGI share a common fold, their sequences are heterologous. These proteins share only 13 identical residues (indicated by asterisks in panel C); the only conserved motif, ESI, coloured cyan in panels A and B and highlighted cyan in panel C, is located on the 1<sup>st</sup>  $\beta$ -strand of each inhibitor, which docks in the Ung-DNA binding cleft.

**Pairwise sequence alignment of synthetic Ugi variant (EAM-Ugi) and a phage MarsHill heuristic match (accession: QQM14549.1) generated by PHI-BLAST search using EAM-Ugi and the PROSITE pattern I-Q-E-A-M (highlighted yellow) as inputs.**

EAM-Ugi DE-----STDENVMLLTSDAPEYKPWALVIQDSNGENKIKML-----  
 MarsHill-hit QE**MAAKLTKG**FNLDKTVFIFSDKAPEYKPVVSIIYQSINKVTSLGSKRRFVKSIETIAH  
 : \* . \* : \* : : : . \* \* \* \* \* . : \* . \*

The two proteins share 31% identity, the long insertions (highlighted green) in the MarsHill sequence take place between (rather than within) Ugi  $\beta$ -strands and  $\alpha$ -helices.

## Supplementary Figure S12.

### Analysis of specific Ugi/SAUGI properties.

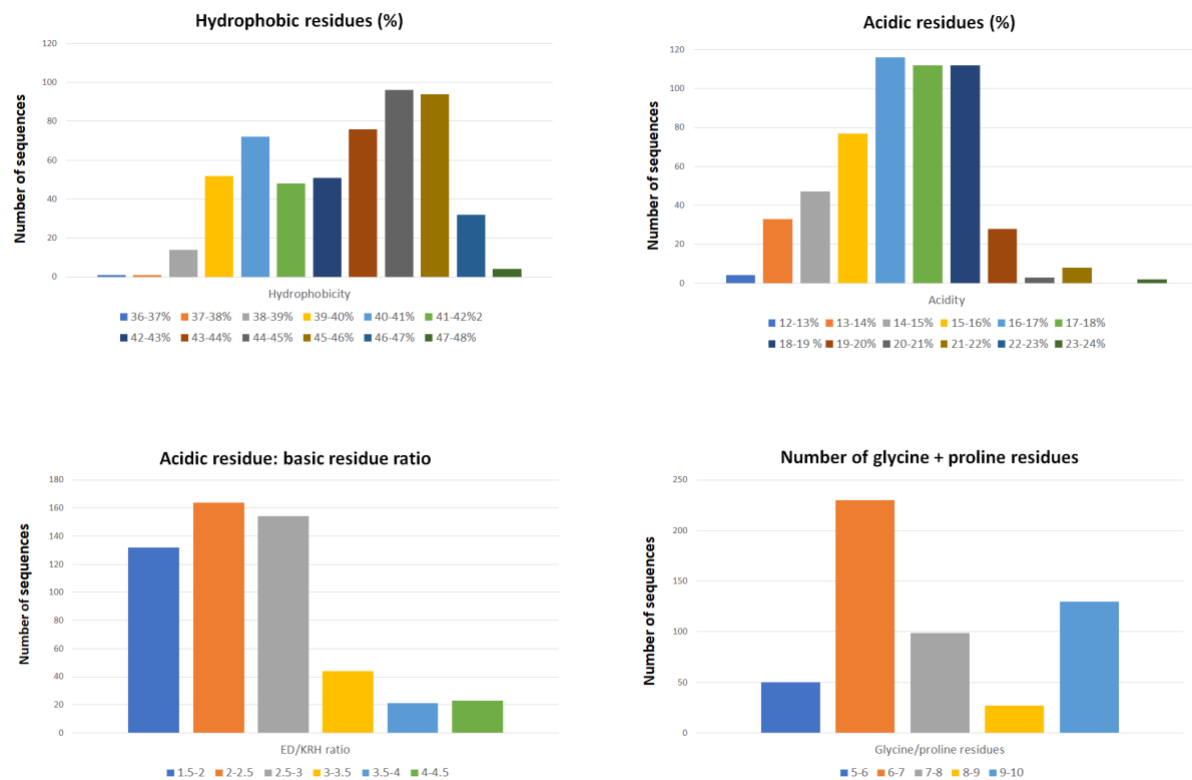

Histograms show the distribution of hydrophobicity, acidity, acidic/basic residue ratio, and glycine/proline content in Ugi/SAUGI sequences. Hydrophobic residues were defined as [IVLFMTWA], and acidic residues were defined as [ED].

### Supplementary Figure S13.

Validation of filters using known Ugi-encoding genomes.

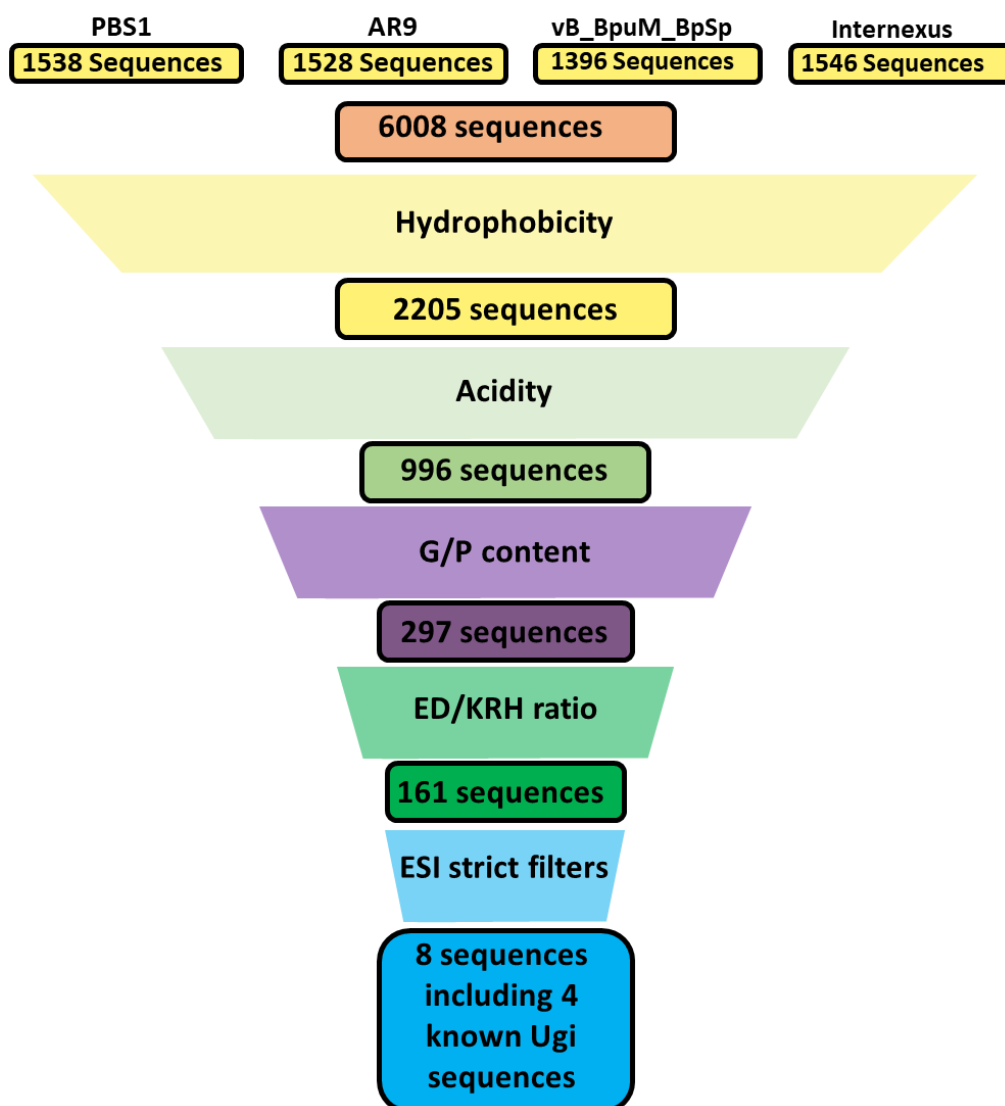

Phage genomes PBS1, AR9, vB\_BpuM-BpSp, and vB\_BspM\_Internexus were used as inputs to the pipeline, and parameters were refined until as few sequences as possible were retrieved at final output. Several filtration steps were applied. Out of 6008 input sequences, only 8 sequences including the 4 expected Ugi sequences passed the funnel of filtration.

## Supplementary Figure S14.

Schematic of the filter pipeline for the *Myoviridae* Genomes.

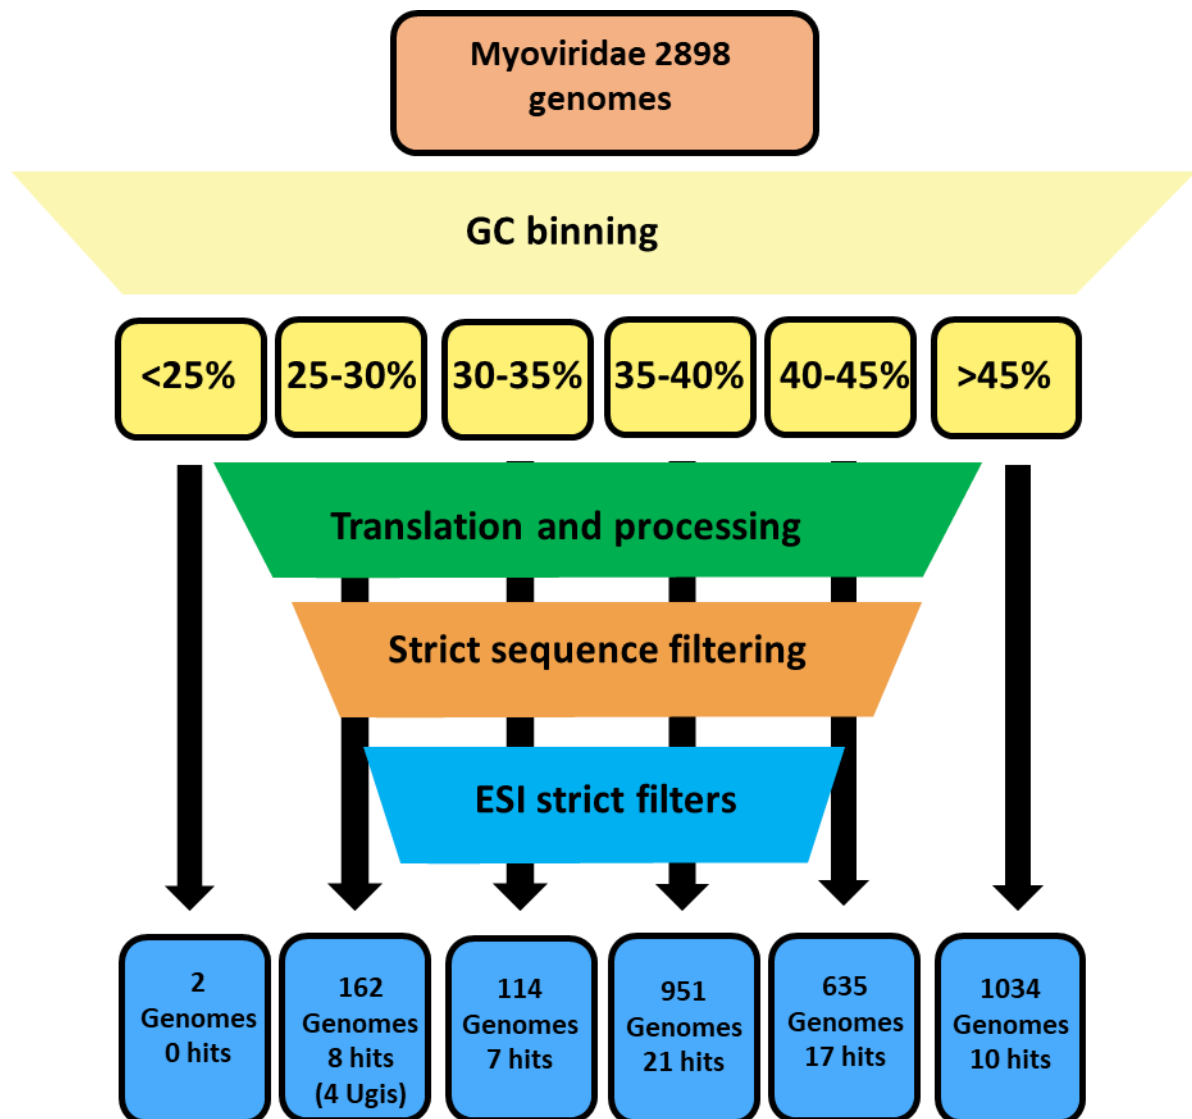

All known Ugi sequences were found in the second lowest GC content bin (25-30%). The highest heuristic matches rate (hits per 100 genomes) is found in the genomes with GC content of 25-35%.

## Supplementary Figure S15.

MSAs of Ugi variants with heuristic matches from uracil-DNA phages.

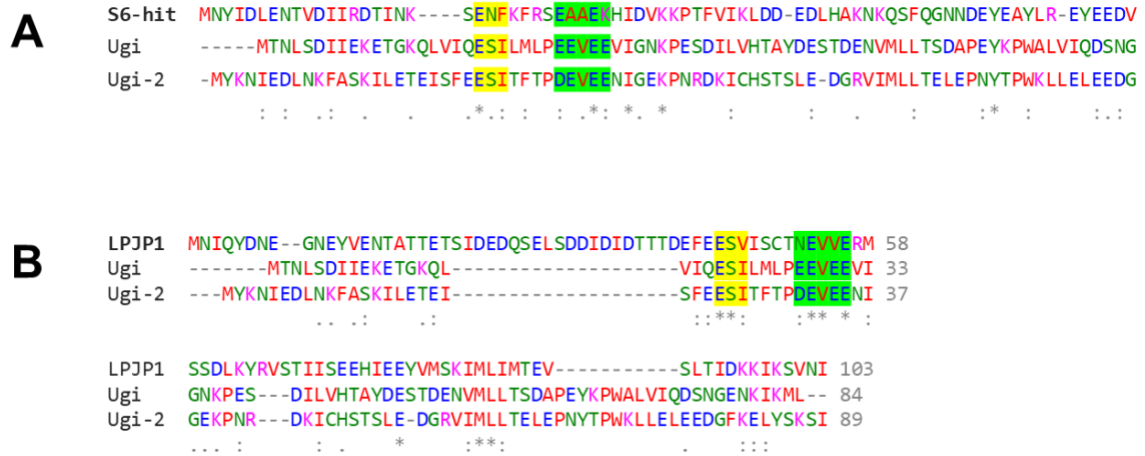

**A)** MSA of Ugi, Ugi-2 and a heuristic match from the *Staphylococcus* phage S6. **B)** MSA of Ugi, Ugi-2 and a heuristic match from the *Listeria* phage LPJP1. Both S6 and LPJP1 heuristic matches exhibit a plausible sequence conservation in the ESI motif (highlighted yellow) and the acidic motif located on the Ung-binding  $\alpha$ -helix of Ugi (highlighted green).



## Supplementary Figure S16.

### Comparison of PZA p56 and Goe4 hit structures.

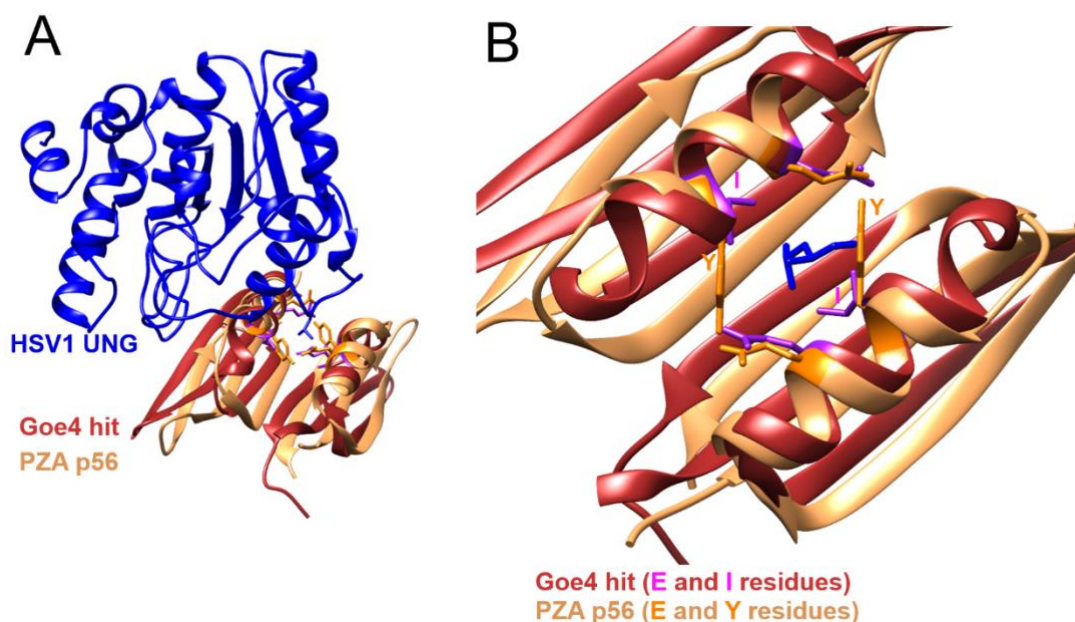

**A)** The structure of HSV1 UNG in complex with PZA p56 (PDB: 4L5N) is superimposed with the AlphaFold predicted structure of a hit from phage Goe4 (pLDDT score: 88.40). Monomer structure prediction of the phage Goe4 p56-homologous hit was performed, then 2 monomers were superimposed upon PZA p56 monomers. AlphaFold monomer prediction was used as it generated a prediction with high confidence score, while AlphaFold-Multimer generated a Goe4 dimerization interface (solely made by  $\beta$ -sheets with low confidence prediction score) that is different from the known p56 dimerization interface. Both PZA p56 crystal structure and Goe4 hit predicted structure have a similar fold, however, the recombinant Goe4 hit protein did not inhibit Ung. **B)** A zoomed overview of the PZA p56 hydrophobic pocket (orange coloured residues) and an equivalent virtual hydrophobic pocket of Goe4 hit (purple residues) showing the apical residue of Ung minor groove intercalation loop (leucine, coloured blue) and hiding Ung ribbon for clarity. E and Y residues of PZA E-X-X-Y motif are replaced by E and I in Goe4 hit. The shorter isoleucine side chain might lead to a weaker/less stable dimerization interface or may cause failure of dimerization and hence inability to inhibit Ung. Further biophysical characterisation might lead to better understanding of whether the recombinant Goe4 hit protein exists as a stable dimer, or in some other state.

## Supplementary Figure S17.

### Overall quality of the deposited structures

#### 1. Ugi-2 structure in complex with SAUNG (PDB ID: 8AIM)

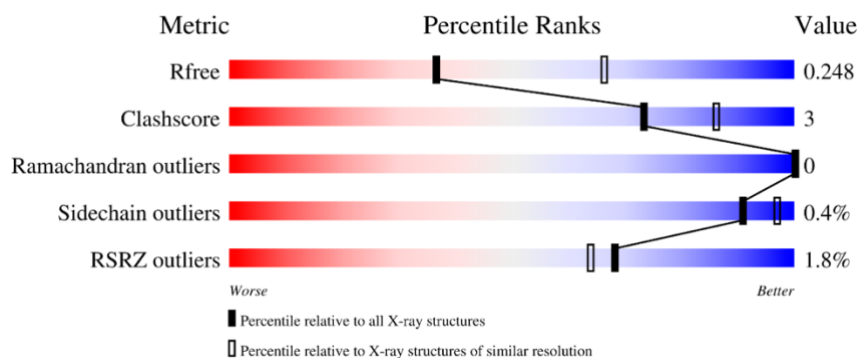

#### 2. MCUGI1 structure in complex with SAUNG (PDB ID: 8AIN)

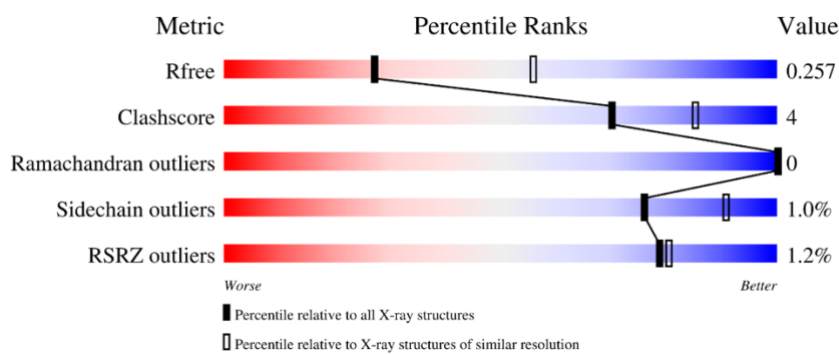

#### 3. VMY22 p56 structure in complex with BwUng (PDB ID: 8AIL)

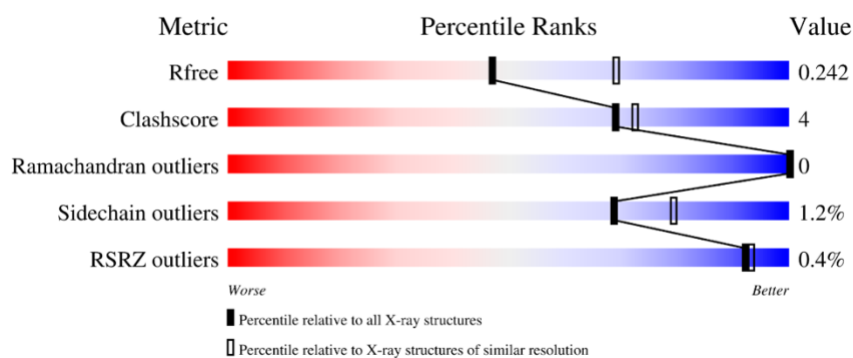

### Supplementary Table S3.

#### Filter set and parameters used for single genome Ugi-like UngIn searches

| Filter                                   | Parameters                                                                        |
|------------------------------------------|-----------------------------------------------------------------------------------|
| Minimum translation length               | 40 amino acids                                                                    |
| Percentage of hydrophobic residues       | 36-48%                                                                            |
| Percentage of acidic residues            | 12-24%                                                                            |
| Number of glycine and proline residues   | 5-10                                                                              |
| Ratio of acidic to basic residues        | [E+D] : [K+R+H] ratio > 1.0                                                       |
| ESI motif filter                         | Lenient ESI filter: E-X-[IVLFMWPC]                                                |
| ESI distance from C-terminus             | 50-120 residues from stop codon                                                   |
| ESI surrounding aspartates/glutamates    | E+D count ≥ 7 in 28-residue window spanning from residue E-6 to residue E+22      |
| ESI surrounding glycine/proline residues | G+P count= 2 or 3 in 20-residue window spanning from residue E-6 to residue E+20  |
| ESI acidic residue position              | 7 <sup>th</sup> or 8 <sup>th</sup> residue from start of ESI motif must be E or D |

### Supplementary Table S4.

#### Filter set and parameters used for the *Myoviridae* Ugi-like UngIn searches.

These filters and parameters were run on 2898 phage genomes from the family *Myoviridae* as input.

| Filter                                   | Parameters                                                                        |
|------------------------------------------|-----------------------------------------------------------------------------------|
| Minimum translation length               | 40 amino acids                                                                    |
| Percentage of hydrophobic residues       | 36-48%                                                                            |
| Percentage of acidic residues            | 12-24%                                                                            |
| Number of glycine and proline residues   | 5-10                                                                              |
| Acidic/basic residues ratio              | [E + D] : [K + R + H] ratio > 1.0                                                 |
| Acidic-residue-free stretch              | A maximum window of only 8 residues without a glutamate or aspartate residue      |
| ED motifs                                | At least 3 [ED]-[ED] motifs                                                       |
| ESI motif filter                         | Strict ESI filter: E-[ASVFHTNI]-[LVIFMTPCW]                                       |
| ESI distance from C-terminus             | 50-120 residues from stop codon                                                   |
| ESI surrounding aspartates/glutamates    | E+D count ≥ 7 in 28-residue window spanning from residue E-6 to residue E+22      |
| ESI surrounding glycine/proline residues | G+P count= 2 or 3 in 20-residue window spanning from residue E-6 to residue E+20  |
| ESI acidic residue position              | 7 <sup>th</sup> or 8 <sup>th</sup> residue from start of ESI motif must be E or D |

## Supplementary Table S5.

### Filter set and parameters used for the *Myoviridae* Ugi-like UngIn searches.

These filters and parameters were run on 2898 phage genomes from the family *Myoviridae* as input.

| Filter                                   | Parameters                                                                        |
|------------------------------------------|-----------------------------------------------------------------------------------|
| Minimum translation length               | 40 amino acids                                                                    |
| Percentage of hydrophobic residues       | 36-48%                                                                            |
| Percentage of acidic residues            | 12-24%                                                                            |
| Number of glycine and proline residues   | 5-10                                                                              |
| Acidic/basic residues ratio              | [E + D] : [K + R + H] ratio > 1.0                                                 |
| Acidic-residue-free stretch              | A maximum window of only 8 residues without a glutamate or aspartate residue      |
| ED motifs                                | At least 3 [ED]-[ED] motifs                                                       |
| ESI motif filter                         | Strict ESI filter: E-[ASVFHTNI]-[LVIFMTPCW]                                       |
| ESI distance from C-terminus             | 50-120 residues from stop codon                                                   |
| ESI surrounding aspartates/glutamates    | E+D count $\geq$ 7 in 28-residue window spanning from residue E-6 to residue E+22 |
| ESI surrounding glycine/proline residues | G+P count= 2 or 3 in 20-residue window spanning from residue E-6 to residue E+20  |
| ESI acidic residue position              | 7 <sup>th</sup> or 8 <sup>th</sup> residue from start of ESI motif must be E or D |

## Supplementary Table S6.

Matches generated by applying Ugi parameters set on *Myoviridae* genomes.

Matches annotated in their respective genomes as Ugi are listed in bold font.

| Phage name                               | accession number | Heuristic match sequence                                                                                                                                                        |
|------------------------------------------|------------------|---------------------------------------------------------------------------------------------------------------------------------------------------------------------------------|
| <i>Clostridium</i> phage JD032           | MK473382.1       | LVELKKEYIDKTIKLLDEVRELKVRKEVLNDEIEF<br>LKKNEKLSSINFNELGFPVRSGNYGIDDMIINSQE<br>KIYIKETEIEIIDSRIEMINIYTKRLSEEEQEIIIS<br>LRHFDPKINSYGEISELLMISKTVVQRKYTDALRK<br>ITLMKYGEEAKEDRE    |
| <i>Bacillus</i> phage vB_BpuM-BpSp       | KT895374.1       | <b>VIIIEILKFNISIIISFIFTMIHKNNKRKHNLRKD</b><br><b>NSLMYKNIEDLNKFASKILETEISFEESITFTPDE</b><br><b>VEENIGEKPNRDKICHSTSLEDGRVIMLLTELEPN</b><br><b>YTPWKLLLEEDGFKELYSKSI</b>          |
| <i>Bacillus</i> phage AR9                | KU878088.1       | <b>VNYIKIGIIERENLNWEYTSNTKIRRNFMNTNLS</b><br><b>IIKETGKQLVIQESILMLPEEVEEVIGNKPESDI</b><br><b>LVHTAYDESTDENVMLLTSDAPEYKPWALVIQDSN</b><br><b>GENKIKML</b>                         |
| <i>Clostridium</i> phage phiC2           | DQ466086.1       | VHAEHIRLCSRSHLYFTSERLQNTTFFLCNCLKNK<br>LKEETMTEYIEVGRIFFDEEGEIIIFYEGQSKGNV<br>PERKNIKKIEYIDLEYDYVDYDKYKIIGIDIRTKQ<br>PILEEIPVYMSEEEK                                            |
| <i>Myoviridae</i> sp. isolate ctbc_4     | MH622943.1       | VNGVENMTDVYDDVEKYVKEAVSNNTMSSSAKYC<br>FDMAIKTRTFTNTTHSMTWLQKAMSYSVGVHHSEY<br>KRLFENEVIVPELDEGDVITVVPKVVWKLGSRE<br>KGFFSRYLVDCKNKI                                               |
| <i>Salicola</i> phage Sctp-2             | MF360958.1       | LSKVYTMEEFTSEQIPDELYDELNSSFGSVRTDL<br>VVEYDENDPNKPQVNQNWRSFKSITTSSGDNQLVT<br>QKAVNPETFEVEEMEGYNTFSFKVRVEFSENEPDI<br>LRQVLGFFTFTPVNK                                             |
| <i>Bacillus</i> phage vB_BspM_Internexus | MW749003.1       | <b>VNYIKIGIIERENLNWEYTSNTKIRRNFMNTNLS</b><br><b>IIKETGKELVIQESILMTPEEIEEVIGNKPESDI</b><br><b>LVHTAYDESTDENVMLLTSDAPEYKPWALVIQNNN</b><br><b>GENKIKML</b>                         |
| <i>Bacillus</i> phage vB_BspM_Internexus | MW749003.1       | VDVANLLEDTVKSGTLLNIAIWICKYNREIVTKDK<br>TKKPCVLVYTQENSIRETLQRIQFVHSTGSNIENYT<br>EEEALRIIREEVIGIDENGEAPIDLFIKYRPNKSI<br>STSDLDTCDDLELEGYEVVCLIQDYTKRIRSSSY<br>NPSDLRLELGSVVDDFTVA |
| <i>Pelagibacter</i> phage HTVC008M       | KC465899.1       | IKSINVQSKVTVKTRSVMTIKTKEDIIETIEYAIK<br>DIKSGMEESGIAELEDLVKDIKDPKMMTVDLKKQY<br>DWRTDYDWTDLNDHPVELPDGWVKV                                                                         |
| <i>Vibrio</i> phage ValB1MD              | MK387337.1       | VKMSKEIEEAQIEEMKEVVNEESVESEGGEDTNVL<br>PGDSQIVNIFGRKYLADSVSPRAHAIVKDLGTVD<br>EIKRLETSMRVAQLARSALVINFEESKNFTEIEV<br>QVLKK                                                        |
| Lake Baikal phage Baikal-20-5m-C28       | MG198570.1       | INVSTVISRDIRQIKLINGEELLTEVIGEDSLELF<br>IRMPKLVVKEKVTMGEMNREANMFTNWMSFSDSED<br>FIISRNVLVESAVNVSVARHYLEMENIDQDHVT<br>RVNSNKDVPNPEKLRERAIASQLLDDEEPTYH                             |
| <i>Yersinia</i> phage fHe-Yen9-01        | KY593455.1       | IQRSKMQEGKFYSFNEAFRADFIEDNSTNENMLRL<br>IEEGGGSFEVLEMVTEDTGKYVRRVRMKNGEVYDA<br>DIPGDEYFELSNWEFKYFVEVVGLTTEGAQMSMLV<br>VTRENAEEMIELIKKAFNK                                        |
| <i>Proteus</i> phage SJ_PmiM             | MW367898.1       | LFLILIGMCAFNYRKNLMFLMNREEALEAMKDGHK<br>IMHEYFSPEEHFYMVNGNIIDESGYDWNFLFFKRD<br>MYEKGWAIKE                                                                                        |

|                                           |            |                                                                                                                                                                                                                                    |
|-------------------------------------------|------------|------------------------------------------------------------------------------------------------------------------------------------------------------------------------------------------------------------------------------------|
| <i>Providencia</i> phage<br>PSTRCR_127    | MW358927.1 | INNITSLVNRLFDNGKTPMEMFGVNWNIIEELEKT<br>METIQFECVEKPDDVDWYTKGKIYDAVNSRVNSIC<br>EDHYVKTDGVLGLISNVNGVYMSLLIHDIKFRRV                                                                                                                   |
| <i>Providencia</i> phage<br>PSTRCR_121    | MW385300.1 | INNITSLVNRLFDNGKTPMEMFGVNWNIIEELEKM<br>METIQFECVEKPDDVDWYTKGKIYDVVTSRVNSIC<br>EDHYVKTDGVLGLISNVNGVYMSLLIHDIKFRRV                                                                                                                   |
| <i>Cronobacter</i> phage<br>vB_CsaM_GAP32 | JN882285.1 | IMRYEAFMGTDDEFlySGESGEISTKMLKFMEAITD<br>ENEAGTFEIKEEVVGGIPLYASVCFPDWAEALFL<br>IQFYEYSWELLEES                                                                                                                                       |
| <i>Cronobacter</i> phage<br>vB_CsaM_GAP32 | JN882285.1 | VFVCQFTTTKIRINYMSKVLKHVSLVTENCEVFTL<br>NGSDLIWTDYQKQDDIRNPFRSMSEVLGLCFSKD<br>SQILLEKSFISSLQFNKRTDITWVEFVFDNDETEI<br>VTICWPEGEENRYLTEHPGQRWFVTPEGNFMFQSW<br>YATDKERMINLDESIYDLRAMDKKA                                               |
| <i>Vibrio</i> phage 1.193.O._10           | MG592562.1 | MEYFHFKKVNDLRAFLAKRHEDINLNASISQPSFY<br>FVTTDKVVHRATGTKMLAQVLNDFGNYSVEDSV<br>TVTRQRGTLAYALQEKQEKVETPVQEEKEEVITEP<br>EVEEVVEDSPSLISLEVEEDVTEDSKVPDWAWIES<br>LENTPEDKLELDKYAESEFSVKLSRTMKLGNMVKK<br>FKEELAKR                          |
| <i>Vibrio</i> phage 1.187.O._10           | MG592553.1 | MEYFHFKKVNDLRAFLAKRHEDINLNASISQPSFY<br>FVTTDKVVHRATGTKMLAQVLNDFGNYSVEDSV<br>TVTRQRGTLAYALQEKQEKVETPVQEEKEEEVIT<br>EPEVEEVVEDSPSLISLDVEEDVVAEGSKEPDWAW<br>IESLENTKDDKNEFDKYCESEFSVKLSRTMKLSNM<br>IKKFKEELAKR                        |
| <i>Acinetobacter</i> phage Ab_121         | MT623546.1 | VDFDSINQQIENFIESRVNEFKGCDPSALMDIFEN<br>PIYAEKLEEFMEKCGPDIDDDIFAKRINQHFKEIG<br>FETE NVGKIFDEALCIQLVMQPFVFNALKEFVG<br>YQK                                                                                                            |
| <i>Synechococcus</i> phage B3             | MN695334.1 | IKTLNKT LKNPTQMKISRKSIIDDRSAIGHFILSA<br>ITEVRPEVFETIDRGDDEFVCMTFNGVEIPIDVV<br>INKWVERNROGINKAAVNLI AEKLDVINDKIRQAE<br>EEIQEKLSDLKSDIAESFNLQYNSWDDYFYENDDH<br>A                                                                     |
| <i>Vibrio</i> phage RYC                   | AP014858.1 | MAQRLFFRNKALLVNALKEYFPTLDVEKSKSRIRS<br>RFSLVFGEEVIYSGTVSEMVSNLNKVAGKDFVVKR<br>AYLKGKSGYVIFLNEDPKELVVEDAVQE QEEKSEV<br>EKTEIDKEVVAPDAVDWEWVEGLGNTKEDKLALDQ<br>YAEKFDVKLSRTMKIENMVAKFKEALEAK                                         |
| Marine virus AG-345-E15<br>Ga0172270_11   | MH319741.1 | IRDLESEIQKLTEQLADRNTHEHEKLTTFKDKLSST<br>YEELSSRKDTISYYDFMYSLLRDGGVKTIIKKYL<br>PLINQQVNRYLQKMDFYINFTLDEEFNETVQSPIH<br>EDFSYASFSEGEKMRIDLALLFTWREVARMKNSVN<br>TNLLIMDEVFDSSLDGMGTDEFLKIIRYVIKDTNI<br>FVISHKPEMHEKFESMIRFEKVKGFSRMVEQ |
| <i>Aeromonas</i> phage Aszh-1             | MN871442.1 | MKMFSTVTSLLTVRNKIFFEFYIKDISSGELIWFT<br>YDGFAYLFKKDTNEFIDCEIDYDDPEEPQRVVDKF<br>INSPCDLPHRFSLVQIDQLQEELKDRLYQDFRFN<br>RDMTDKK                                                                                                        |
| <i>Bacillus</i> phage Shbh1               | KU640380.1 | IRRMKVHEISLVKYAGEYVWTLADFSHTRDVSNY<br>ADHASVKS AIRTFVVRNNPDKYISFRGEQQIKNLI<br>TENKTNNLFILPHFQGHTRTALIHWSILEELTDKF<br>PTLEEYEEEDFENFIEEAKFMDQPKPVQDPPESSVI<br>GERAAVIHSLRTQIQRLDEEIKVRQSNREKILQAI<br>NALENLDVTEV                    |

|                                                         |            |                                                                                                                                                                                                                |
|---------------------------------------------------------|------------|----------------------------------------------------------------------------------------------------------------------------------------------------------------------------------------------------------------|
| <i>Pseudoalteromonas</i> phage HM1                      | KF302034.1 | IMSDNTLQKIRNLEQDIVDLQQLLRVESSFRSKYE<br>LEVDAIYKTLIKMGMLETFKEEHFSGGREDDVEEF<br>THFMGESPLLGEDISVNMSGYTLEEHKQ RVAALRE<br>FNEGE                                                                                    |
| <i>Escherichia</i> phage vB_EcoM_G8                     | MK373787.1 | IMDFFTPEANQKNINKFFSIASTITRQLETALLCM<br>ETVENIHTYPFKNICGWEGYKIVISLREVKCAYS<br>PTDKEIYQQKCDEIVNTPKEETTLEELMECLDDSP<br>EVEIRPEVIALEKAYKEVLEISNKAQKEYEQAKKI<br>WEESVNRLDRLEQALQLIK                                 |
| <i>Synechococcus</i> phage B23                          | MN695335.1 | IKTLNKT LKNPTQMKISRKSIIDDRSAIGHFILSA<br>ITEVRPEVYETIDRGDDEFVCMTFNGVEIPIDVV<br>INKWVERNRRQGINKA AVNLIAEKLDELHVKILQAE<br>QEIQEKLSDLKSDIAESFNLQYNSWDDYFYENDDH<br>A                                                |
| <i>Aeromonas</i> phage AsSzw2                           | MN871441.1 | MKMFSTVTSLLTVRNIKFFEFYIKDISSGELSWFT<br>YDGFAYLFKKDTNEFIDCEIDYDDPEEPQ RVVDKF<br>INSPCDLPHRFS LVDQIDQLQEELKDRLYQDFRFN<br>RDMTDKK                                                                                 |
| <i>Acinetobacter</i> phage TAC1                         | MK170160.1 | VDFDFINQQIENFIESRVNEFKGCDPSALMDIFEN<br>PIYAEKLEEFMEKCGPDIDDDIFAKRINQHFKEIG<br>FETE NVGKIFDEALCIQLVMQPFVFNALKEFVG<br>YQK                                                                                        |
| <i>Escherichia</i> phage T2                             | LC348380.1 | MNLIKIKQLFVNYEFFTPETNQKNINKFFSIASTI<br>TRQLETALLCMETVENIHTYPFKNICGWEGYKIVV<br>SLREVKCAYSPTDKEIYQQKCDEIVNTPKEETTLE<br>ELMECLDDSPPEVEIRPEVIALEKAYKEVLEISNK<br>AQKEYEQAKRIWEESVNRLDRLEQALQLIK                     |
| <i>Aeromonas</i> phage CC2                              | JX123262.1 | MKMFSTVTSLLTVRNINFFEFYIKEISSGELSWFT<br>YDGFAYLFKKDTNEFVDCEIDYDDPEEPQ RVVDKF<br>INSPCDLPHRFS LVDQINQLQEELKDRLYQDFRFN<br>RDMTDKK                                                                                 |
| <i>Aeromonas</i> phage AS-yj                            | MF498774.1 | IMTDVMRIRFLSEKDKEHFVSRSVNANTHIANHMG<br>MVWNRVSFDGRRWYLV DENNNEVVVDGDVDSFIH<br>PSEYQFFEW DILPIEKKKSIKELWDIAQKKAEYD<br>DAMTEYNKAVMEKLDESAI                                                                       |
| <i>Vibrio</i> phage 1.161.O._10                         | MG592529.1 | MEHFHFKKINDLRAFLSKRHEEINLNASISQPSFY<br>FVTKDGKVHRATGTKMLAQVLNELFGNFYSVEDSI<br>TVTRQRTGLAYTLQE QEKVVKA EVVVPVEEVKDVV<br>SEPEVLEELAVDESVAEVAVEEVVEDAKEPDWAWI<br>ESLENTKEDRIELDRYAEFFSVKLSRTMKLANMV<br>KKFKEELAKR |
| <i>Aeromonas</i> phage AS-szw                           | MF498773.1 | IMTDIMRIRFLSEKDKEHFVSRSVNANTHIANHMG<br>MDWNRVSFDGRRWYLV DENNNEVVVDGDVDSFIH<br>PSEYQFFEW DILPVEKKKPIKELWDIAQKKAEYD<br>DAMTEYNKAVMEKLDESAI                                                                       |
| <i>Myoviridae</i> sp. isolate 131                       | MN856013.1 | MKYPEYSGTY YDKFKVTEIDYGVVTVKFFSELHED<br>WIEAWAQTEVEEITLHVGD SLRPEHDHDEDFYIGQ<br>LKDNVAWELEASSIDQEF GSKFIFNHHIQQINQVL<br>QDDFADKL                                                                               |
| <i>Campylobacter</i> phage C2                           | MG065655.1 | VSDMAKIRKLSSNQVVKDFESGEILYVRDADDEGE<br>DLVMLVGHAEDGCIQAVFLETAMVHWIELDLKARK<br>PKAEILIIYED                                                                                                                      |
| <i>Synechococcus</i> phage ACG-2014d isolate Syn7803C45 | KJ019028.1 | MKHHPIDEIRANCFSCFTSLNAAERACVLLGDEAY<br>RESLDLEND DAPCWQIPSGEHSTFAGWNPQCVP<br>TI EYIVWKLKNREGIIKGEIY                                                                                                            |
| <i>Escherichia</i> phage APCEc02                        | KR698074.1 | VSDMAKIRKLSSNQVVKDFESGEILYVRDADDEGE<br>DLVMLVGHAEDGCIQAVFLETAMVHWIELDLKARK<br>PKAEILIIYED                                                                                                                      |

|                                                 |            |                                                                                                                                            |
|-------------------------------------------------|------------|--------------------------------------------------------------------------------------------------------------------------------------------|
| <i>Salmonella</i> phage STML-13-1               | JX181828.1 | IMSVKMKGVFNFAYYNDDEYVVKNAWHDDHCVKVN<br>GEYREELDENIPDDADVIESGTVYIPVEGENGAE<br>EKDISLVNHFKTWRKQKNFSFIVVTVKKDKLAEVR<br>EAMRCIPGVIEVKGN        |
| <i>Escherichia coli</i> O157 typing<br>phage 14 | KP869112.1 | VSNMAKIRKLSNNQVVKDFESGEILYVRDADDEGE<br>DLVMLVGHAEDGCIQAVFLETAMVHWIELDLKARK<br>PKAEILIYED                                                   |
| <i>Escherichia</i> phage naswa                  | MN850595.1 | VSNMAKIRKLSNNQVVKDFEPGEILYVRDADDEGE<br>DLVMLLGHAEDGCIQAVFLETAMVHWIELDMKAR<br>KPKAEILIYED                                                   |
| <i>Escherichia</i> phage V18                    | KY683736.1 | VSNMAKIRKLSNKQVVKDFEPGEILYVRDADDEGE<br>DLVMLLGHAEDGCIQAVFLETAMVHWIELDMKAR<br>KPKAEILIYED                                                   |
| <i>Serratia</i> phage Muldoon                   | MN095771.1 | MKNQNSVRVFTPNTYVLCMEFFYGDDDFQHNHRCT<br>FDPKKYSLDMLREFVTDAKEVTDEQPEELPEWFTK<br>KWDHLVQLLKSCEVWWTLAYVDVWYVDEVGAPWSL<br>EKL                   |
| <i>Enterobacteria</i> phage<br>vB_EcoM-FV3      | JQ031132.1 | VSNMARIRKLSNNQTVKDFEPGEILYVHDADDEGE<br>DLVMLLGHAEDGCIQAVFLETAMVHWIELDLKAR<br>KPKAEILIYED                                                   |
| <i>Escherichia</i> phage naam                   | MN850630.1 | VSDMAKIRKLSNNQIVKDFEPGEILYVRDADDEGE<br>DLVMLLGHAEDGCIQAVFLETAMVHWIELDMKAR<br>KPKAEILIYED                                                   |
| <i>Campylobacter</i> phage D#                   | MG065647.1 | VSDMAKIRKLSSNQVVKDFESGEILYVRDADDEGE<br>DLVMLVGHAEDGCIQAVFLETTMVHWIELDLKARK<br>PKAEILIYED                                                   |
| <i>Serratia</i> phage PS2                       | KJ025957.1 | MITANAVKVFTPNTYVLNLDFFWGDGDICTGYRKI<br>LDPKCFDINQIREFLIEAKEVTEEQPEDLPEWFTD<br>KWPHIYTLLKSDEDIWWTLERADIWYVDEVGTPWS<br>LEKI                  |
| <i>Vibrio</i> phage 1.031.O._10                 | MG592415.1 | IMATTGAKLLEICEAILTNPDYEGERLSDESAIQV<br>TLGKEDVKSFSKLAQEAGLTTKTVGDDTVRVYVDA<br>DTADDSMKAINAIDRAQSYKLEARPNLEGWHAEP<br>GE                     |
| <i>Aeromonas</i> phage asfd_1h                  | MN871507.1 | MEHVKYRFKEYSHISDFVHKDNVNLAIYRDLHDKE<br>FYLKQVEVDKYVAVDAIGDRMYDENIFDFNKTEVD<br>EFLEIVDELAAPVEKPAEEPVEKPLTISQLHDWS<br>IRHALTSLSVEKVVEMYKIYIK |
| <i>Escherichia</i> phage nomo                   | MN850578.1 | VSDMAKIRKLSNNQVVKDFEPGEILYVRDADDEGE<br>DLVMLLGHAEDGCIQAVFLETAMVHWIELDMKAR<br>KPKAEILIYED                                                   |
| <i>Escherichia</i> phage PDX                    | MG963916.1 | VSDMAKIRKLSSNQVVKDFEPGEILYVSYADDEGE<br>DLVMLVGHAEDGCIQAVFLETAMVHWIELDLKARK<br>PKAEILIYED                                                   |
| <i>Salmonella</i> phage ISTP3                   | MT974436.1 | IMSVKMKGVFNFAYYNDDEYWEKGAWHDDHCVKVN<br>GEYREELDENIPDDADVIESGTVYIPVAGESGAE<br>EKDIQLVTHFKNWRKKKNFSFIVVIVKKDKASEVR<br>EALKNISGVMEVKGN        |
| <i>Pectobacterium</i> phage<br>DU_PP_I          | MF979560.1 | LMSKNTRYSHLLFHIMSPELREQFFTDDEENFDAG<br>GDLFETLHPEKAEVLVSLLEPHLEYVIKELKFQRD<br>HNILLGKGDELGAARLAICHRADKLDW                                  |
| <i>Halorubrum coriense</i> virus<br>Hardycor2   | MN901520.1 | MARSGRGRVTNNGRIEVVTEPEDSDFEFPPLFQEQ<br>SFHYQETDFYRTVDGQLFHYITLRNDEDFNWPPTV<br>DVGINIIIEVNDDTHHS                                            |
| <i>Cronobacter</i> phage CR3                    | JQ691612.1 | LMSKNTRYSHLLFHIMSPELREQFFTDDEENFDAG<br>WDLFETLHPEKAEVLVSLLEPHLEYVIKELKFQRD<br>HNILLGKGDELGAARLAICHRADKLDW                                  |



|                                            |            |                                                                                                                                                                 |
|--------------------------------------------|------------|-----------------------------------------------------------------------------------------------------------------------------------------------------------------|
| <i>Vibrio</i> phage vB_ValM-yong1          | MN563793.1 | MSELHQKAEFVLCALADDTYGDSEQGNEVGLFLL<br>QLILRHKKGQLRAAQMDDELGVKTMPIVVSGDLGCQ<br>EITPL                                                                             |
| Bacteriophage P27                          | AJ298298.1 | LYSRTYKSAAEEAMKKFENITVLHVDDFDYTNPELL<br>PEVVKAIDVADIVIRGKRIVKNRLACTSGAMTETT<br>SQQDDYEGICLEPDSFAVNVYHLLHATQVLHMSSN<br>HETKTLGSEILNFACEYAKSAAEKELAQ              |
| <i>Klebsiella</i> phage<br>vB_KaeM_KaOmega | MN013077.1 | LMGKYTRYSNLLVHVMSPELREEFFGDEEEDTDGG<br>WDLFETLHPEKAEMLMEVLPMLDDTIKELQFRRD<br>YNTLLGQGKQTEATRLMICHRASKINWDED                                                     |
| <i>Rhizobium</i> phage RHEph04             | JX483876.1 | MAKFNKFRKGASTFVCECCGHHTRETGQALGAKIC<br>YACFELAGLENMLSDDGEEQFAKVGADDEVKSWMNE<br>IRKRSEAEFERAKASFSSLAPYFSPDEDFTEAPL<br>LSF                                        |
| <i>Escherichia</i> phage ECML-4            | JX128257.1 | IMSVKMKGVFNAYYNDDEYWVKNAWHDDHCVKVN<br>GEYREELDENIPDDADVIESGTVYIPVEGENGAE<br>EKDISLVNHFKTWRKQKNFSFIVVTVKKDKLAEVR<br>EAMRCIPGVIEVKN                               |
| Halorubrum coriense virus<br>Serpecor1     | MN901521.1 | LSLRVLEEHTMTLNTFTDPTDPTDLTDHERRLLRW<br>VGADERLIEVCSFDVTSMERKRGDGKAVTRNSALV<br>EVKKYTREWESLTEENAEDFDHYGGHFFSALWDGD<br>LYEAYTRADYNNKAIMLEVFDVRRINSTRPAHAAE<br>VTV |
| <i>Salmonella</i> phage<br>GEC_vB_MG       | MW006477.1 | VKMTKDLWEVFQDDDEIKVIVSGSLEEGCGWRSYS<br>DVCSEINTLQDAKLIAAAPELLDAVLDLKHKLYGN<br>GPANPKIEELLNRLKGE                                                                 |
